# Supplementary material for: Surface-associated antigen induces permeabilization of primary mouse B-cells and lysosome exocytosis facilitating antigen uptake and presentation to T-cells
Source: eLife journal article supplement (doi:10.7554/elife.66984), 2021-10-27
Supplement: figures [file elife-66984-figures-v2.pdf]

---

## Figures and figure supplements

Surface-associated antigen induces permeabilization of primary mouse B-cells and lysosome exocytosis facilitating antigen uptake and presentation to T-cells

**Fernando Y Maeda *et al***

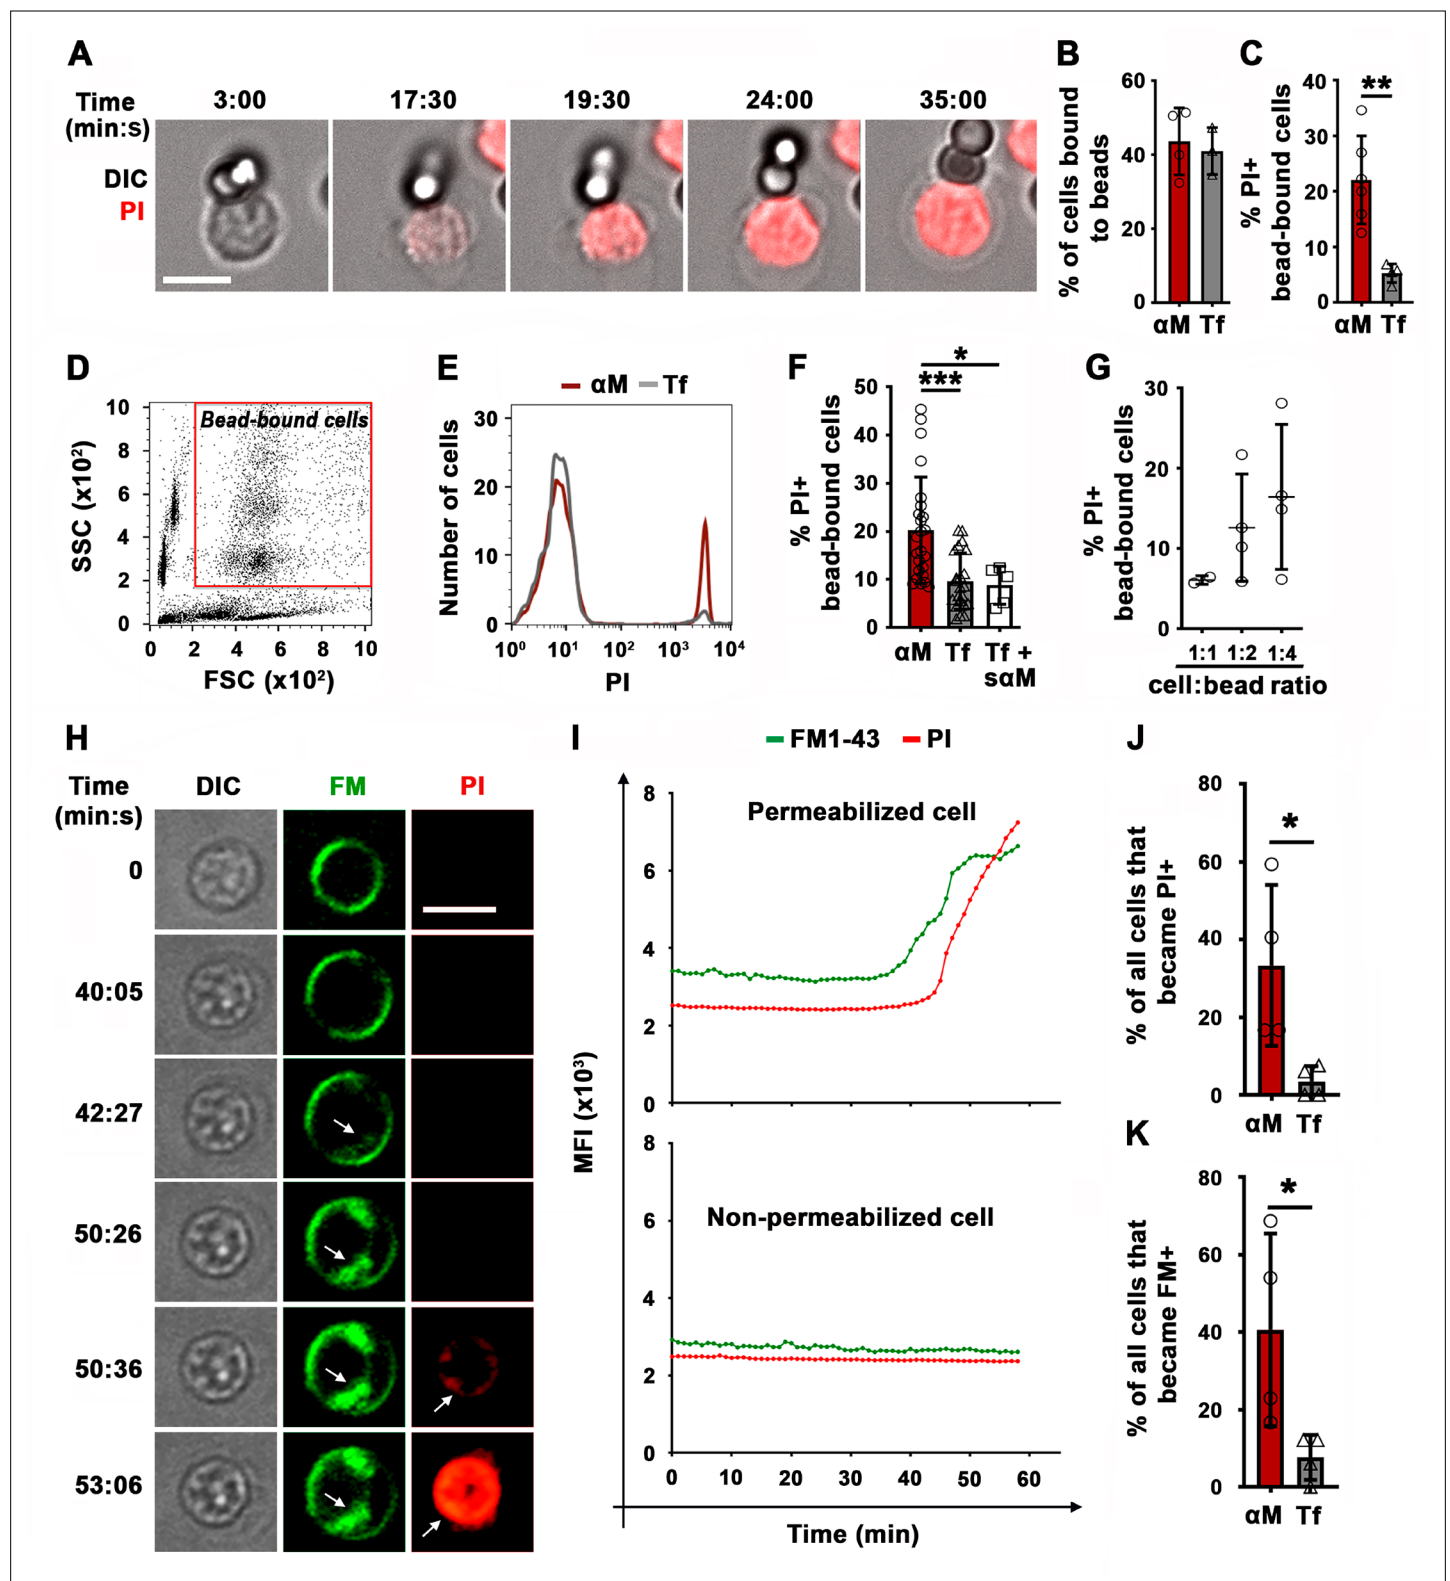

**Figure 1.** BCR binding to surface-associated ligands causes B-cell PM permeabilization. **(A)** Time-lapse images of a splenic B-cell incubated with  $\alpha$ M-beads (1:2 cell:bead ratio) in the presence of PI (**Video 1**). **(B)** Percentages of B-cells bound to beads. **(C)** Percentages of PI-positive (PI+) cells in bead-bound B-cells at 30 min. **(D)** Gate for bead-bound B-cells in forward and side scatter flow cytometry dot plot. **(E)** Histograms of PI fluorescence intensity (FI) of  $\alpha$ M- and Tf-bead-bound B-cells after 30 min incubation, showing 1000 cells per condition. **(F)** Percentages of PI+ bead-bound B-cells after 30 min incubation with  $\alpha$ M- or Tf-beads with or without soluble  $\alpha$ M ( $\alpha$ M). **(G)** Percentages of PI+ bead-bound B-cells after 30 min at indicated

Figure 1 continued on next page

*Figure 1 continued*

cell: $\alpha$ M bead ratios. **(H)** Time-lapse images of a B-cell interacting with  $\alpha$ M-PLB in the presence of FM1-43 and PI (arrows, FM1-43 or PI entry, **Video 4**). **(I)** Mean fluorescence intensity of FM1-43 (green lines) and PI (red lines) in a defined intracellular region of a permeabilized (top) and non-permeabilized (bottom) cell over time. **(J)** Percentages of PI+ B cells interacting with  $\alpha$ M- or Tf-PLB for 60 min. **(K)** Percentages of B-cells interacting with  $\alpha$ M- or Tf-PLB for 30 min showing intracellular FM staining (FM+). Data points represent independent experiments (mean  $\pm$  SD) (**B, C, F, G, J, K**). Bars, 5  $\mu$ m. \* $p \leq 0.05$ , \*\* $p \leq 0.01$ , \*\*\* $p \leq 0.005$ , unpaired Student's t-test (**B, C, J, K**) or one-way ANOVA (**F**).

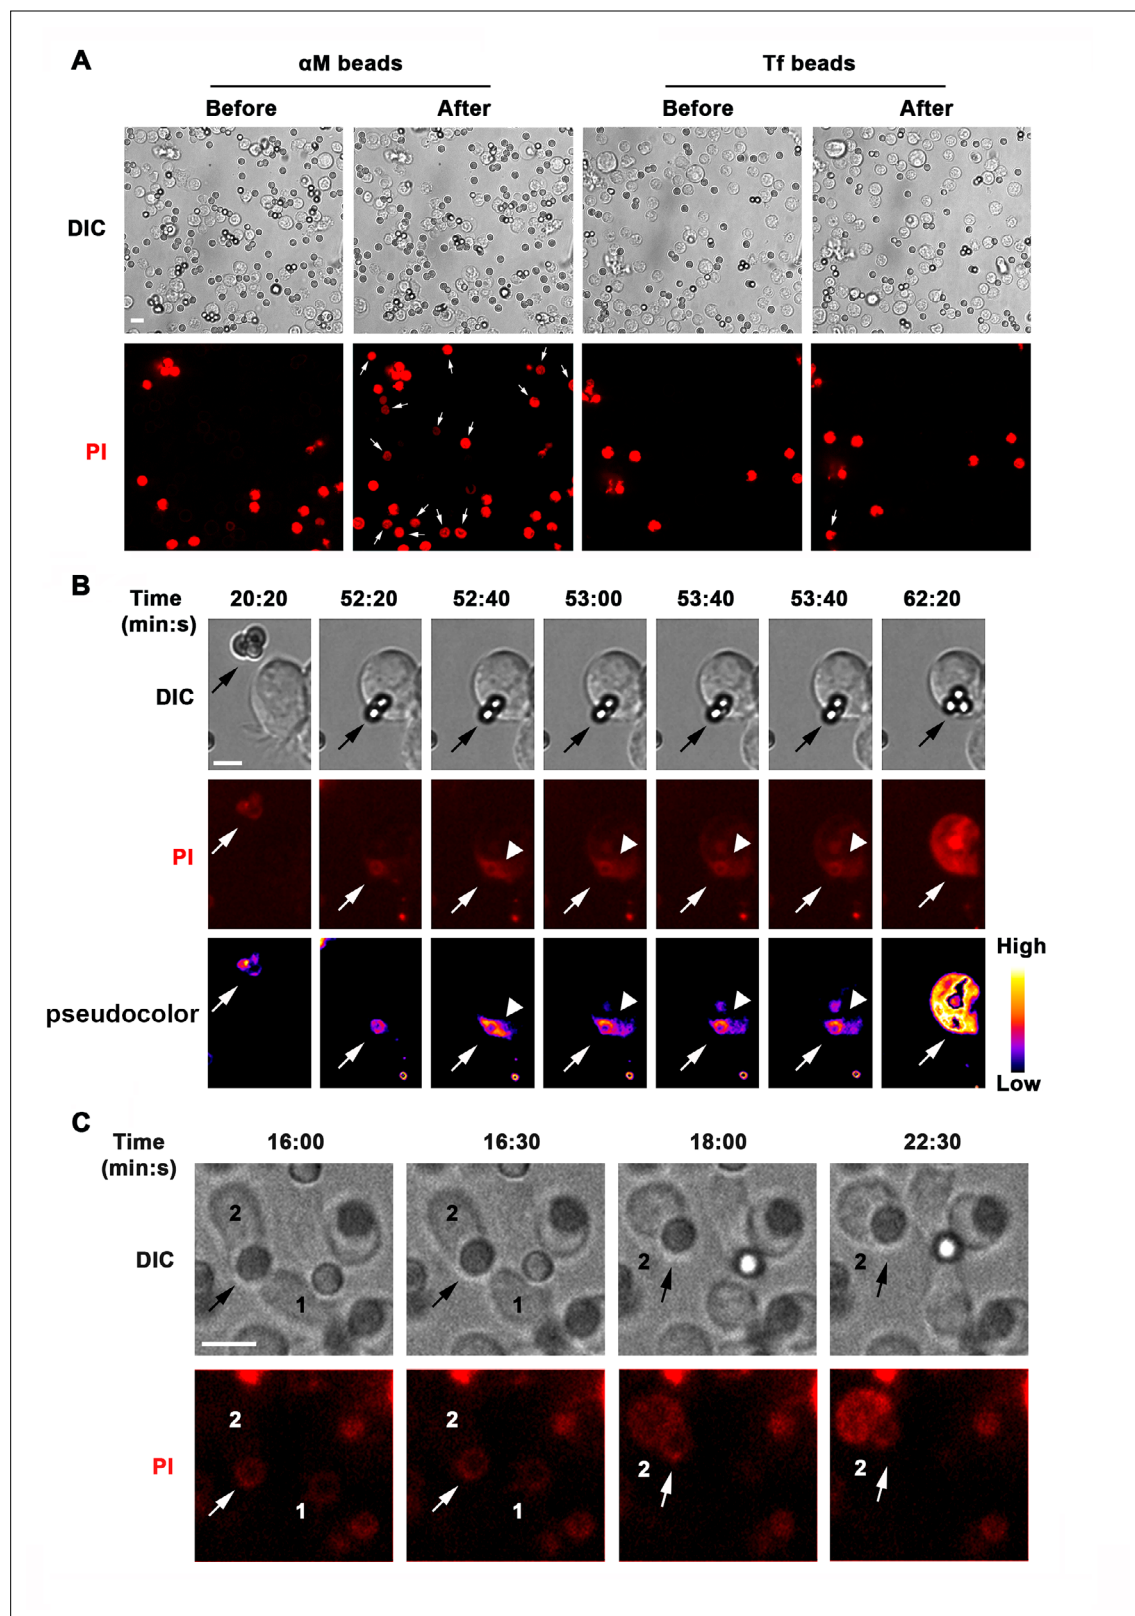

**Figure 1—figure supplement 1.** BCR binding to  $\alpha$ M-beads causes localized PM permeabilization in B-cells. **(A)** Live spinning-disk microscopy images of splenic B-cells incubated with  $\alpha$ M- or Tf-beads before and after 60 min at 37°C in the presence of PI. The arrows point to bead-bound B-cells that became PI + during the incubation (**Video 1**). **(B)** Live spinning disk time-lapse images and corresponding fluorescence intensity (FI) pseudo-color images of A20 B-cells incubated with  $\alpha$ M-beads in the presence of PI. The arrow points to beads that caused permeabilization; the arrowhead points

Figure 1—figure supplement 1 continued on next page



Figure 1—figure supplement 1 continued

to the site of PI entry (**Video 2**). Beads appear faintly red due to autofluorescence. (**C**) Live spinning disk time-lapse images of splenic B-cells incubated with  $\alpha$ M-beads in the presence of PI. The arrow points to a bead that was exchanged between cells (#1, #2) and caused permeabilization of cell #2 (**Video 3**). Bars, 5  $\mu$ m.

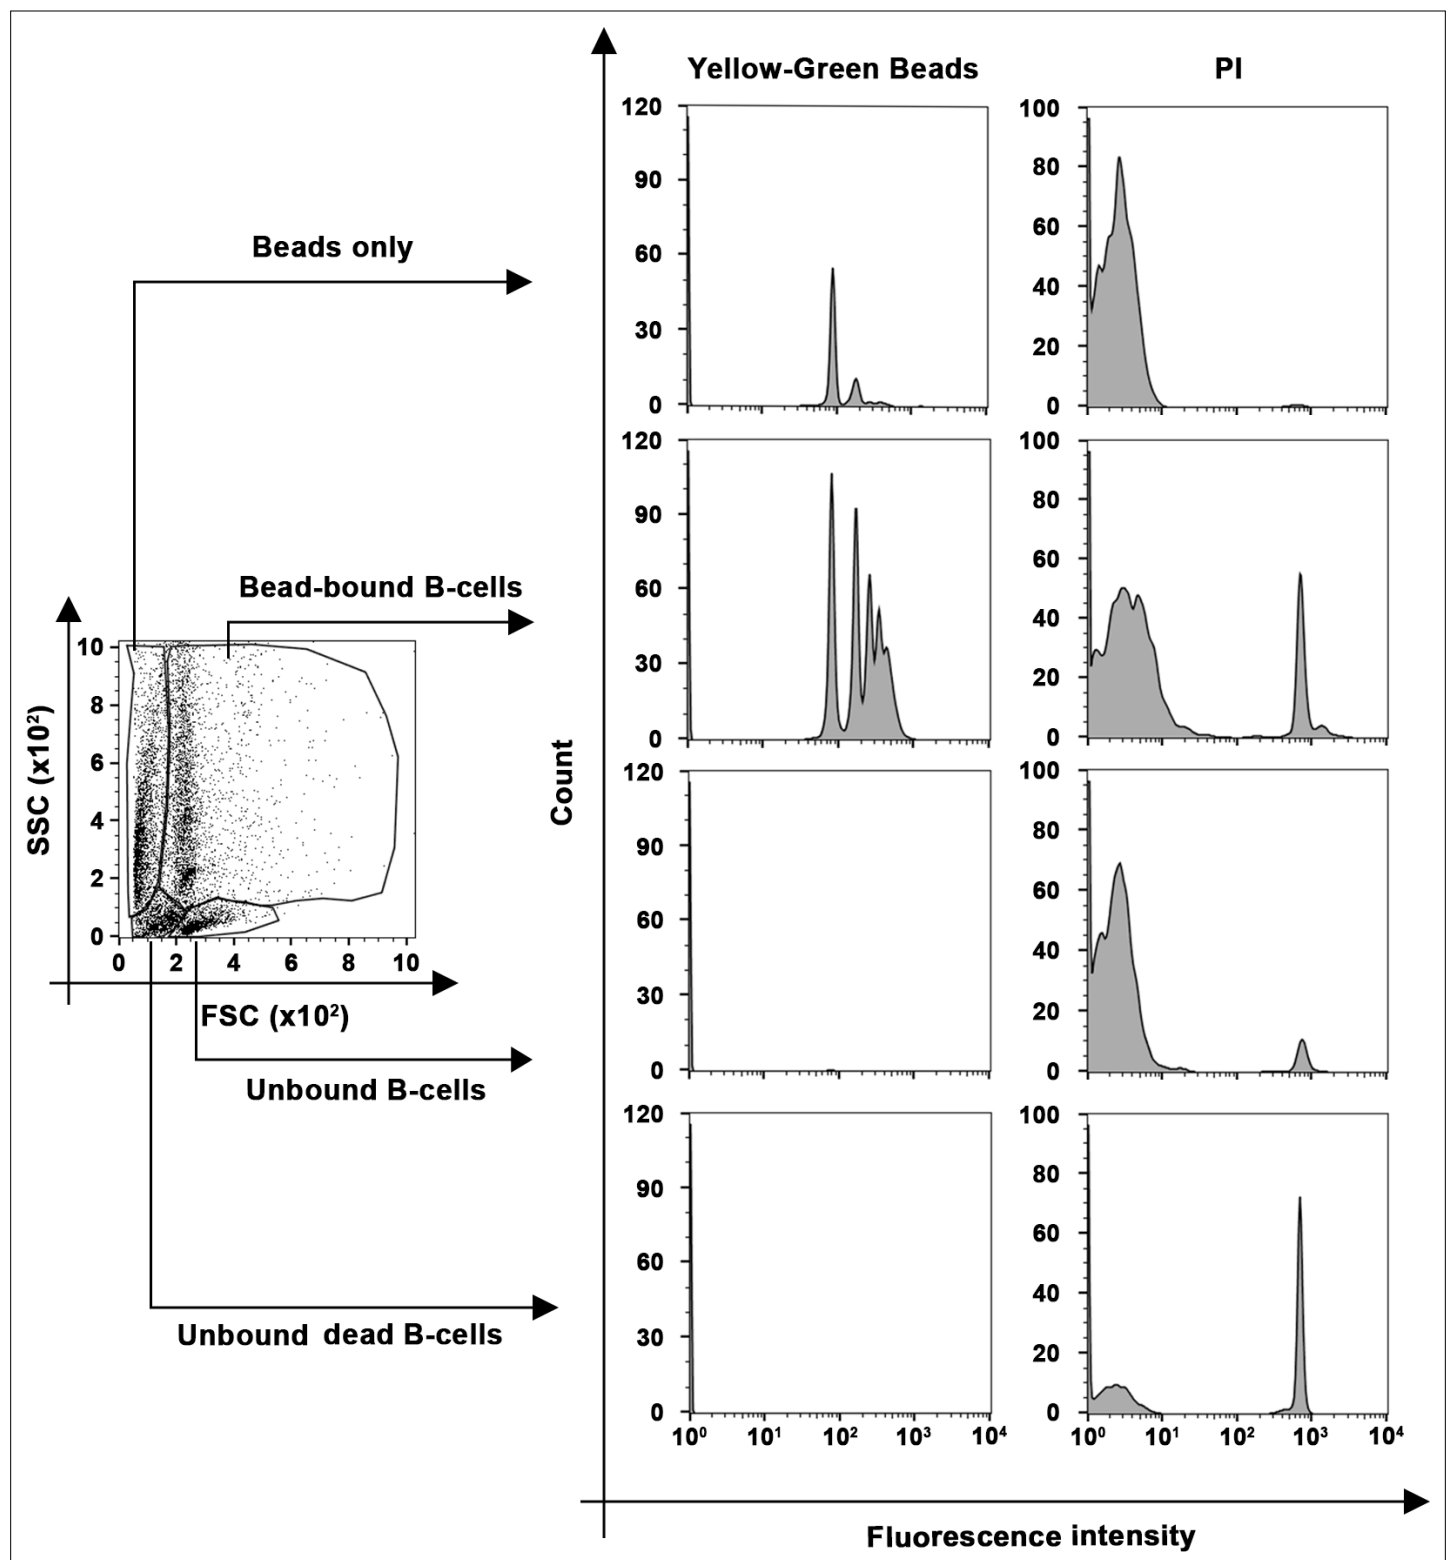

**Figure 1—figure supplement 2.** Identification of bead-bound B-cells by flow cytometry. Splenic B-cells were incubated with  $\alpha$ M-conjugated yellow-green fluorescence beads in the presence of PI and analyzed by flow cytometry. Representative dot plots of side scatter (SSC) versus forward scatter (FSC) and fluorescence intensity histograms of yellow-green beads and PI are shown. Bead-bound B-cells were identified by sizes and the presence of yellow-green fluorescence.

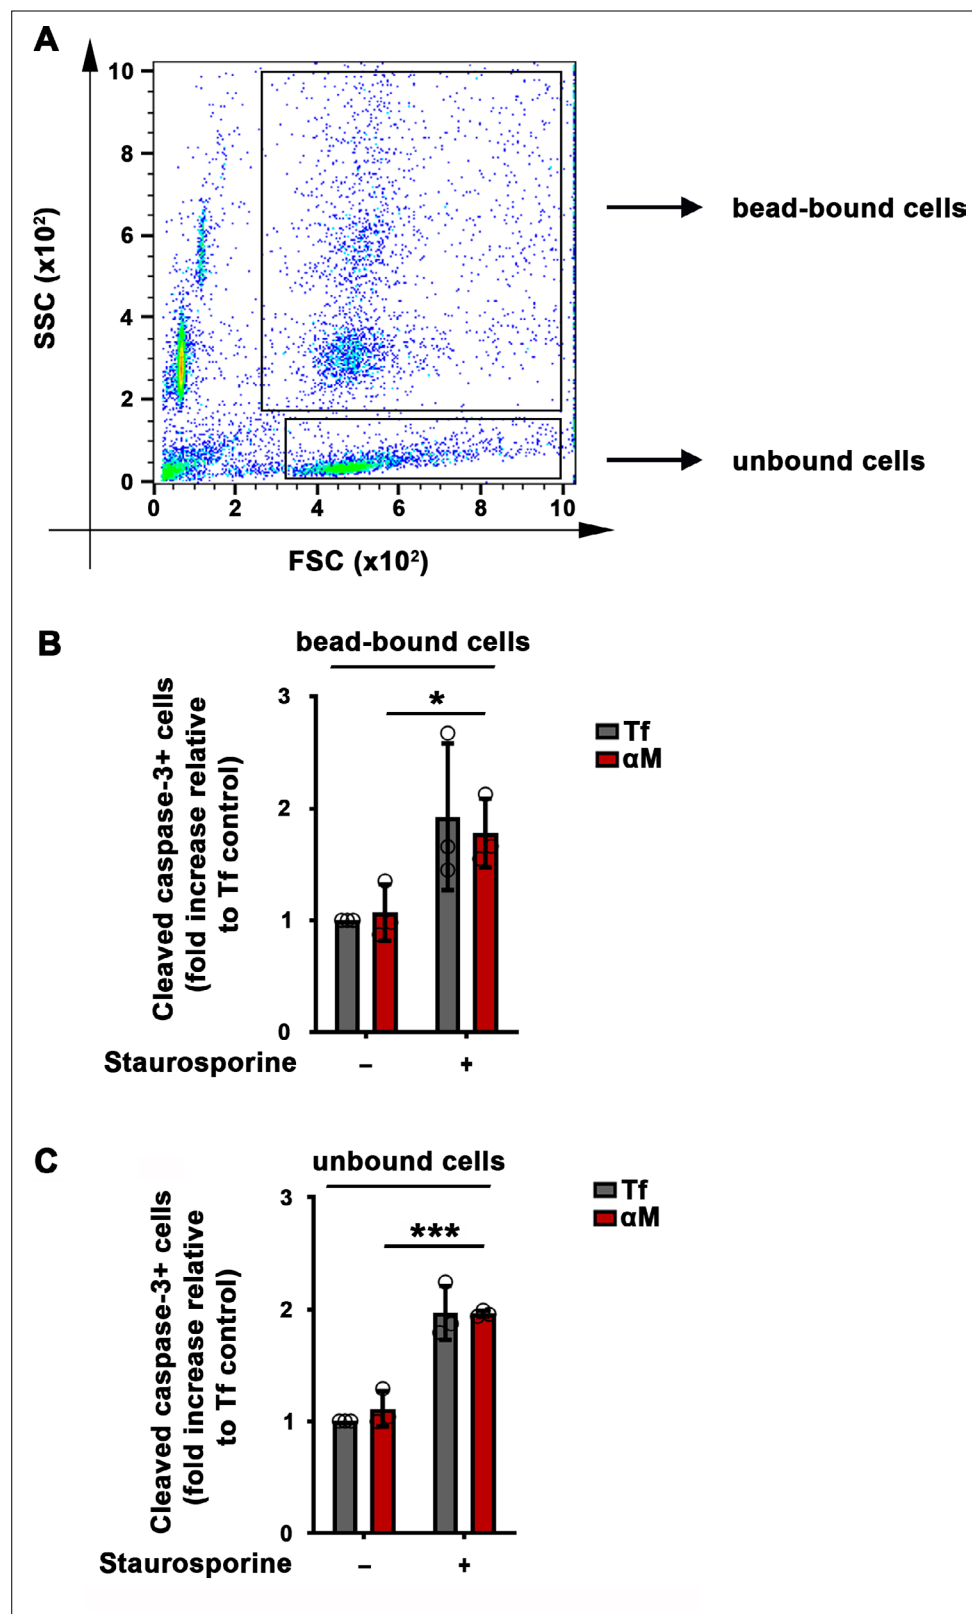

**Figure 1—figure supplement 3.** BCR binding to  $\alpha$ M-beads does not increase apoptosis in B-cells. Splenic B-cells treated or not with staurosporine for 24 hr were incubated with  $\alpha$ M- or Tf-beads for 30 min at 37°C, fixed, permeabilized, stained with antibodies against cleaved caspase-3, and analyzed by flow cytometry. **(A)** Identification of bead-bound and unbound B-cell populations on a side scatter (SSC) versus forward scatter (FSC)

Figure 1—figure supplement 3 continued on next page

*Figure 1—figure supplement 3 continued*

plot. The percentage of cells positive for cleaved caspase-3 was determined in the bead-bound (**B**) or unbound (**C**) cell populations and expressed relative to the Tf-bead control. Data points represent independent experiments (mean  $\pm$  SD). \* $p \leq 0.05$ ; \*\*\* $p \leq 0.005$ , unpaired Student's t-test.

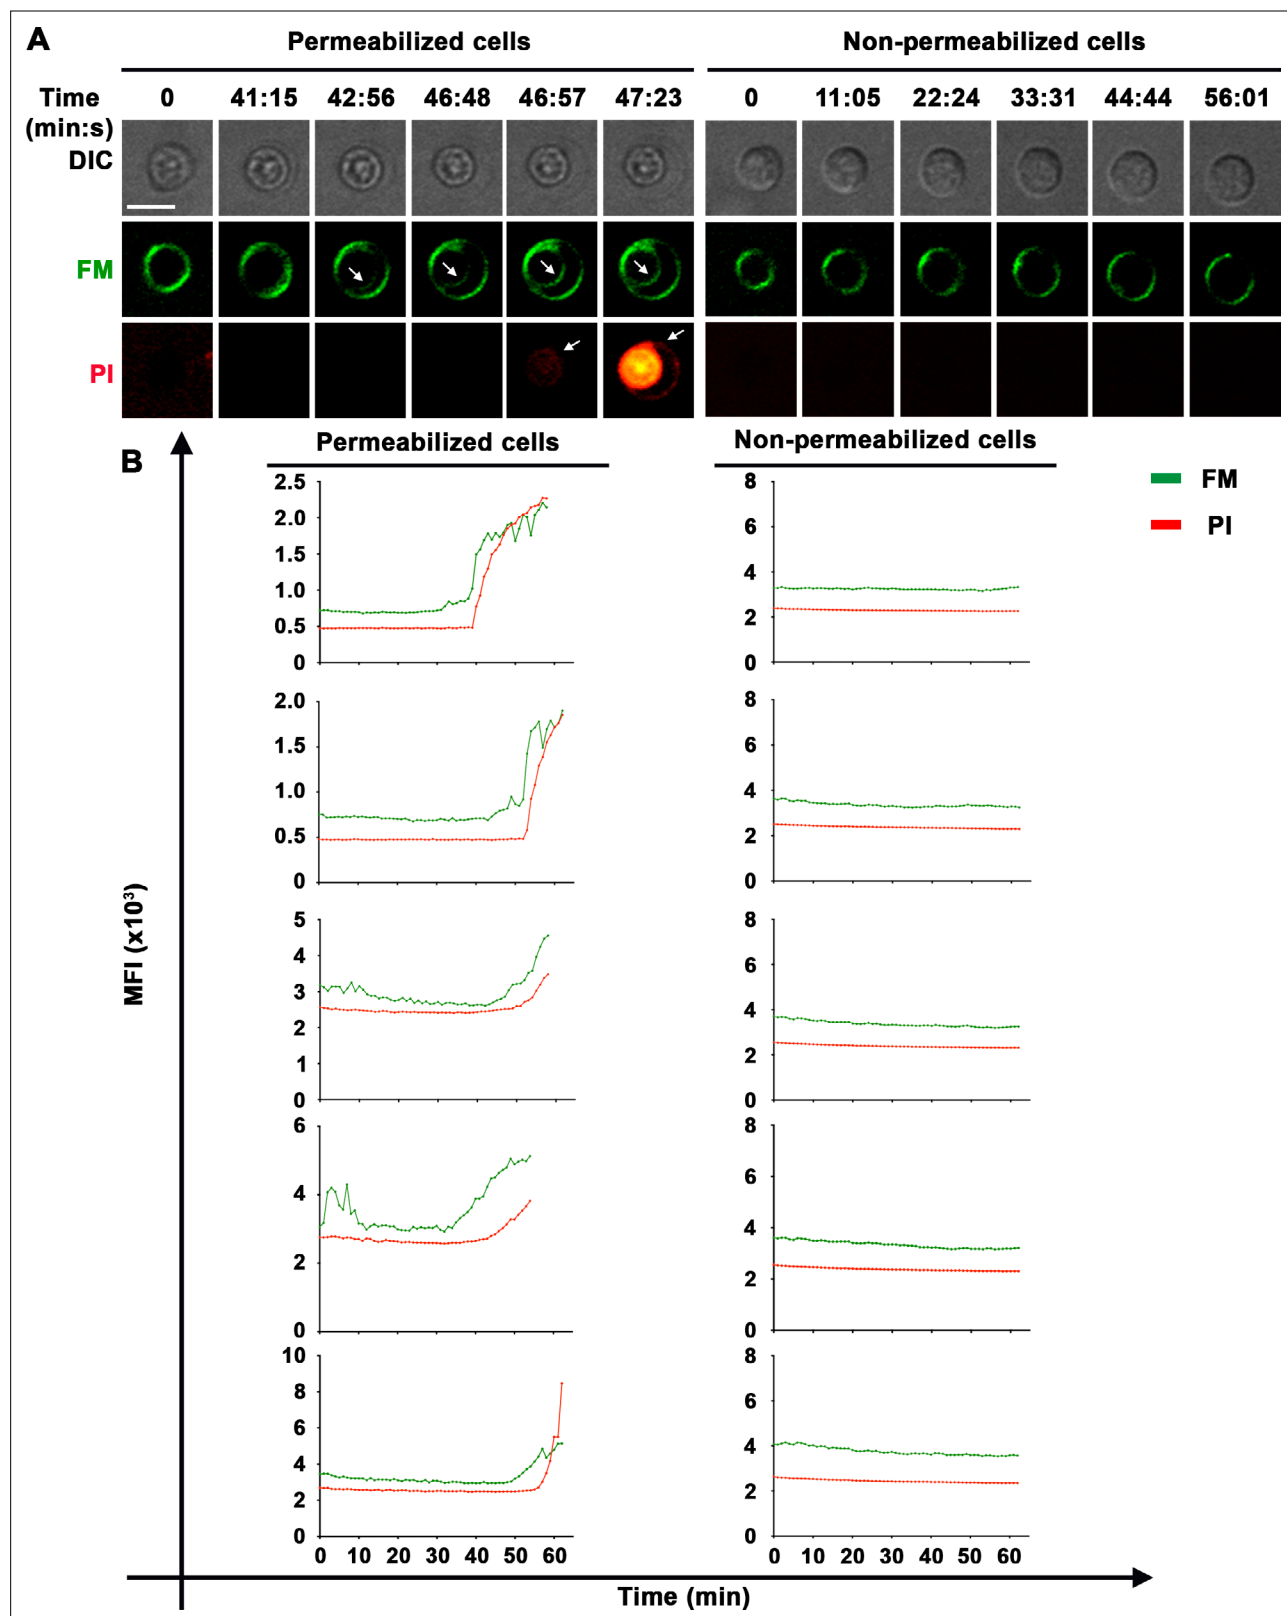

**Figure 1—figure supplement 4.** Sudden increases in intracellular staining with the lipophilic FM dye in B-cells permeabilized by interaction with  $\alpha$ M-PLB. **(A)** Live spinning disk time-lapse images of splenic B-cells (permeabilized or non-permeabilized) after contact with  $\alpha$ M-PLB in the presence of FM1-43 and PI at 37 °C. The arrows point to B-cell sites where intracellular FM or PI was initially detected. **(B)** Mean fluorescence intensity (MFI) of FM (green) and PI (red) over time in a defined intracellular region (**Video 4**) in permeabilized (left, 5 examples) or non-permeabilized cells (right, 5 examples). Bar, 5  $\mu$ m.

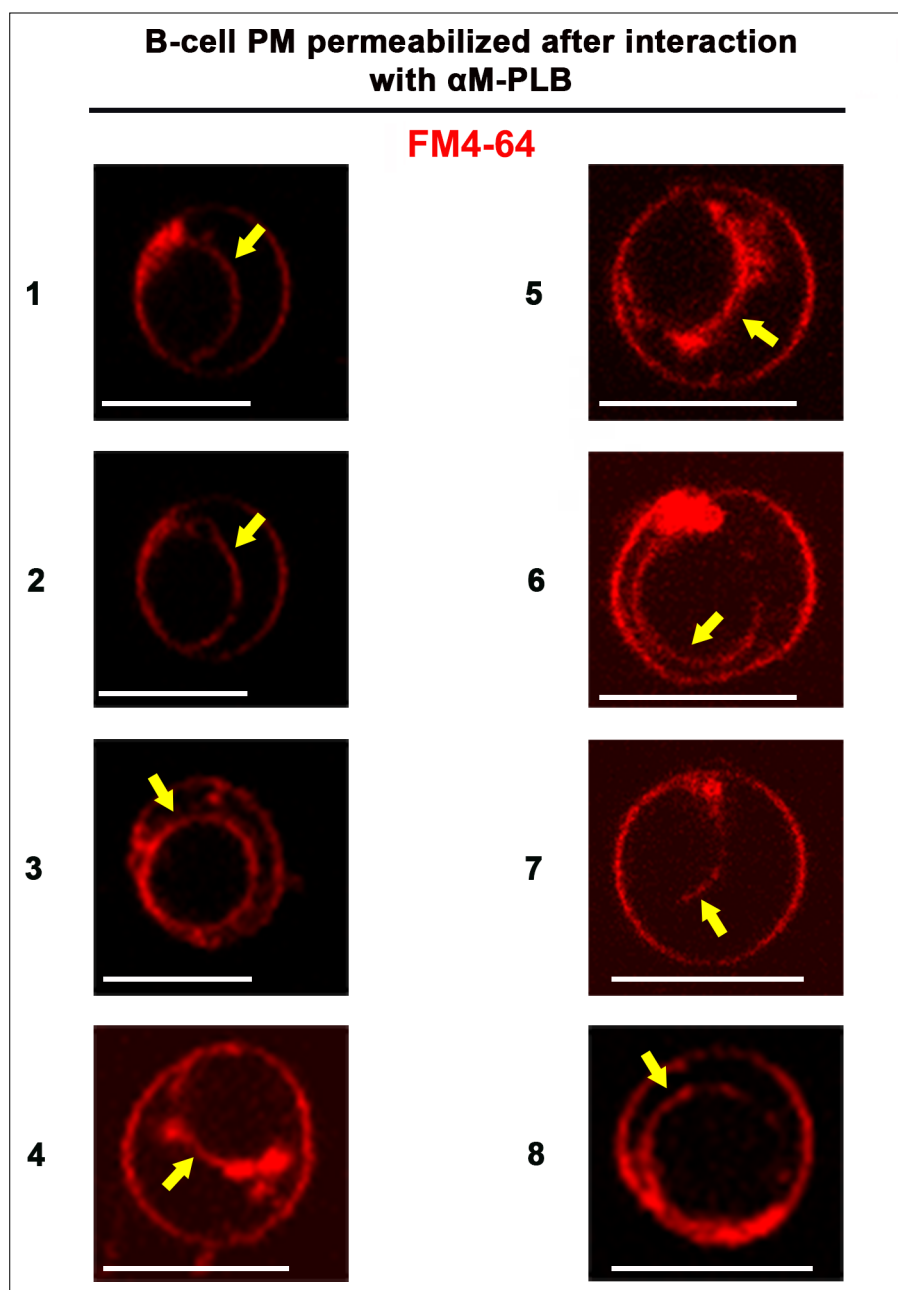

**Figure 1—figure supplement 5.** The lipophilic FM dye enters B-cells permeabilized by  $\alpha$ M-PLB and stains the nuclear envelope. The images show eight examples of FM4-64 nuclear envelope staining (arrows) in splenic B-cells permeabilized by  $\alpha$ M-PLB after 60 min incubation at 37°C and imaged by live spinning disk fluorescence microscopy. Bar, 5  $\mu$ m.

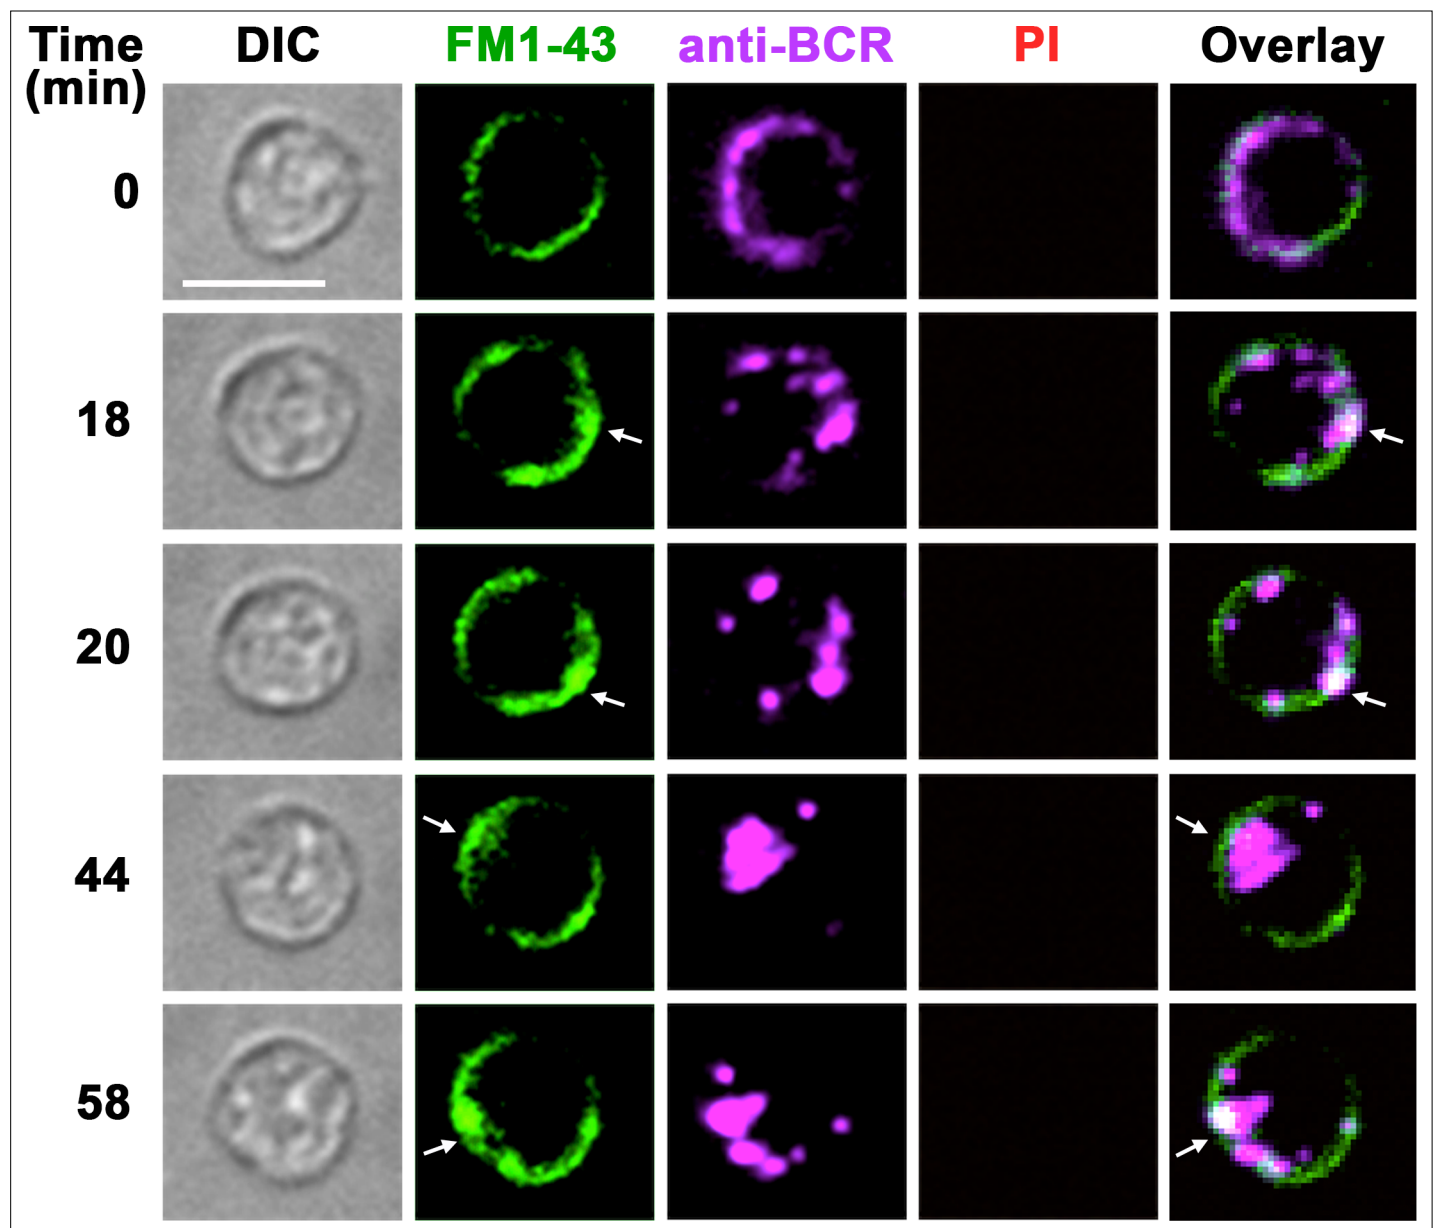

**Figure 1—figure supplement 6.** BCR cross-linking with soluble ligands does not permeabilize B-cells but induces a punctate form of FM uptake at the cell periphery that is distinct from the massive FM influx induced by surface-associated ligands. Spinning disk time-lapse images of B-cells pre-labeled with soluble anti-BCR antibodies and FM1-43 (green) at 4°C and then imaged at 37°C after addition of secondary fluorochrome-labeled crosslinking antibodies (magenta), in the presence of FM1-43 (green) and PI (red, not detected). The arrows point to areas at the cell periphery where small puncta of internalized FM1-43 were visualized next to anti-BCR clusters (**Video 4**). No PI influx was detected, indicating that the B-cells were not permeabilized. Bars, 5  $\mu$ m.



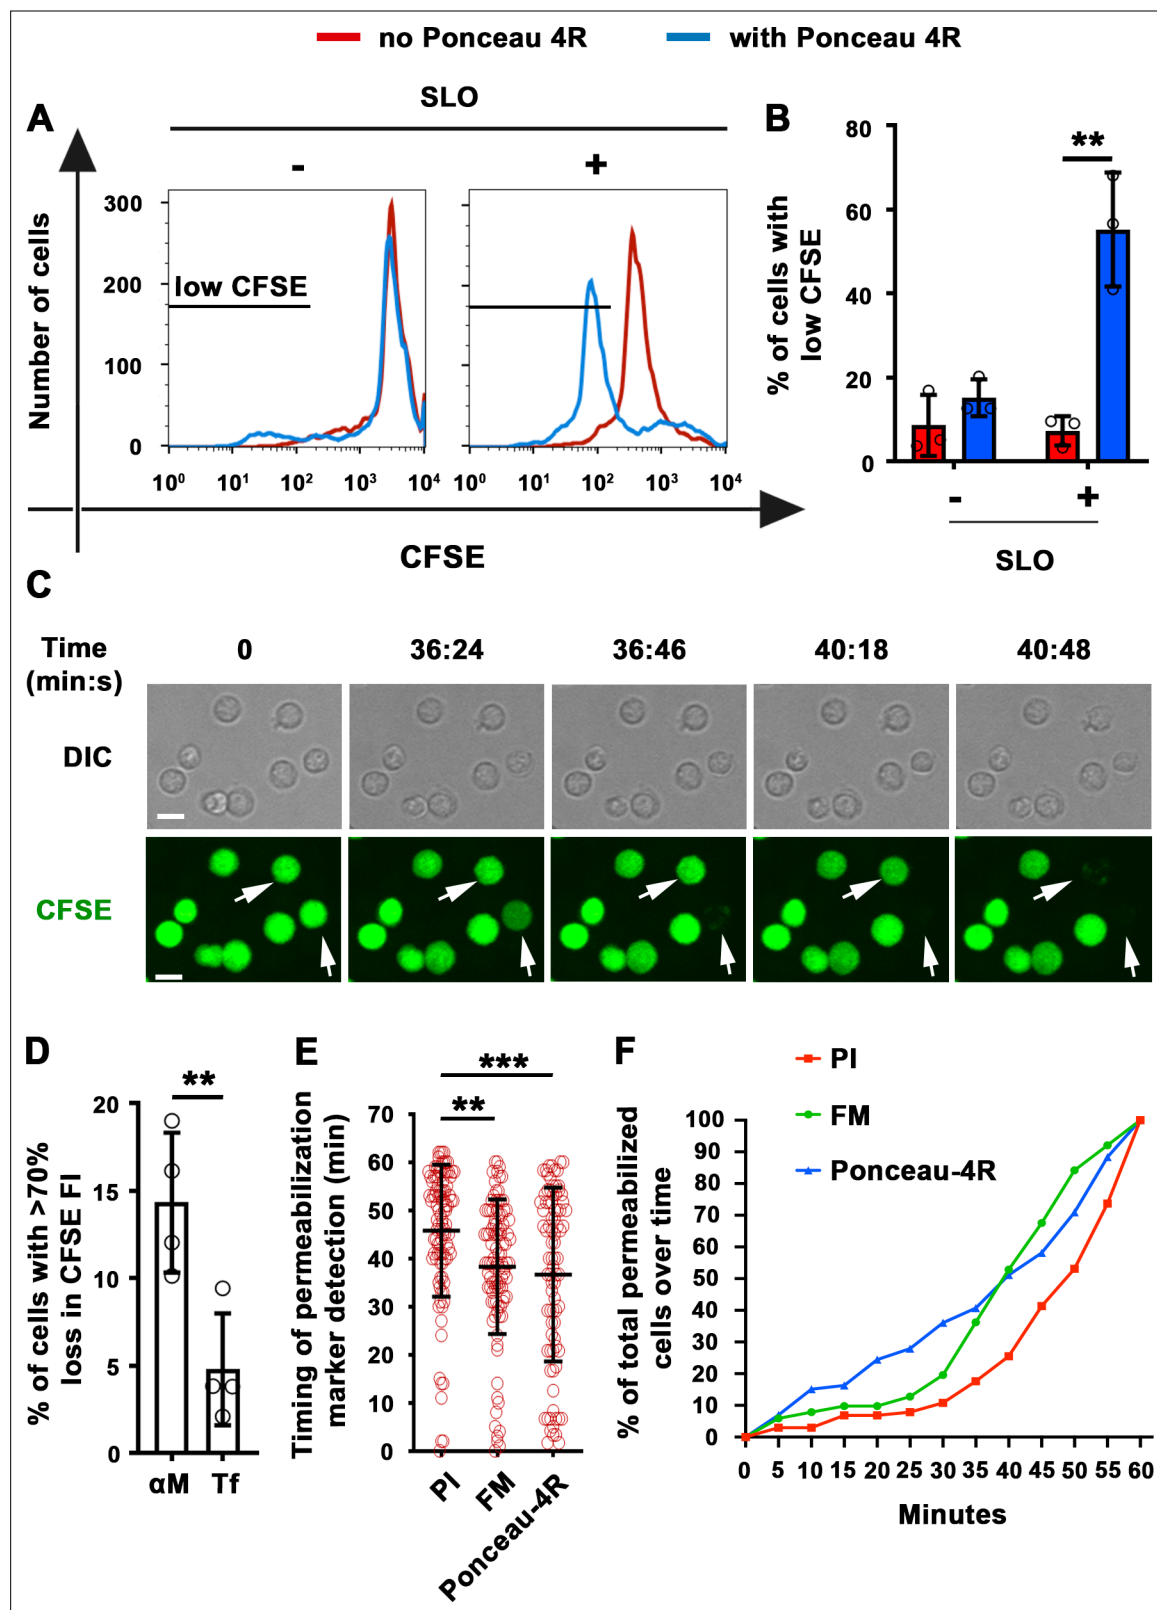

**Figure 2.** Extracellular Ponceau 4 R quenches cytoplasmic CFSE in  $\alpha$ M-PLB-permeabilized B-cells. **(A)** Flow cytometry histograms of CFSE FI in B-cells incubated with or without SLO for 10 min in the presence or absence of Ponceau 4 R, showing 8500 cells per condition. **(B)** Percentages of cells with reduced CFSE in the presence or absence of Ponceau 4 R after treatment with or without SLO. Data points represent independent experiments (mean  $\pm$  SD). **(C)** Time-lapse images of B-cells pre-stained with CFSE interacting with  $\alpha$ M-PLB in the presence of Ponceau 4 R (arrows, cells with Ponceau

Figure 2 continued on next page

*Figure 2 continued*

4 R quenching of cytoplasmic CFSE) (**Video 5**). (**D**) Percentages of B-cells with more than 70 % loss of CFSE FI after 60 min interaction with  $\alpha$ M- or Tf-PLB. Data points represent independent experiments (mean  $\pm$  SD). (**E**) Timing of PI, FM1-43 entry or Ponceau 4R-mediated CFSE quenching in B-cells interacting with  $\alpha$ M-PLB. Data points represent individual cells in at least four independent experiments (mean  $\pm$  SD). (**F**) Cumulative percentages of total permeabilized B-cells detected over time in four independent experiments. Bars, 5  $\mu$ m. \*\* $p \leq 0.01$ , \*\*\* $p \leq 0.005$ , unpaired Student's t-test (**B**, **D**) or one-way ANOVA (**E**).

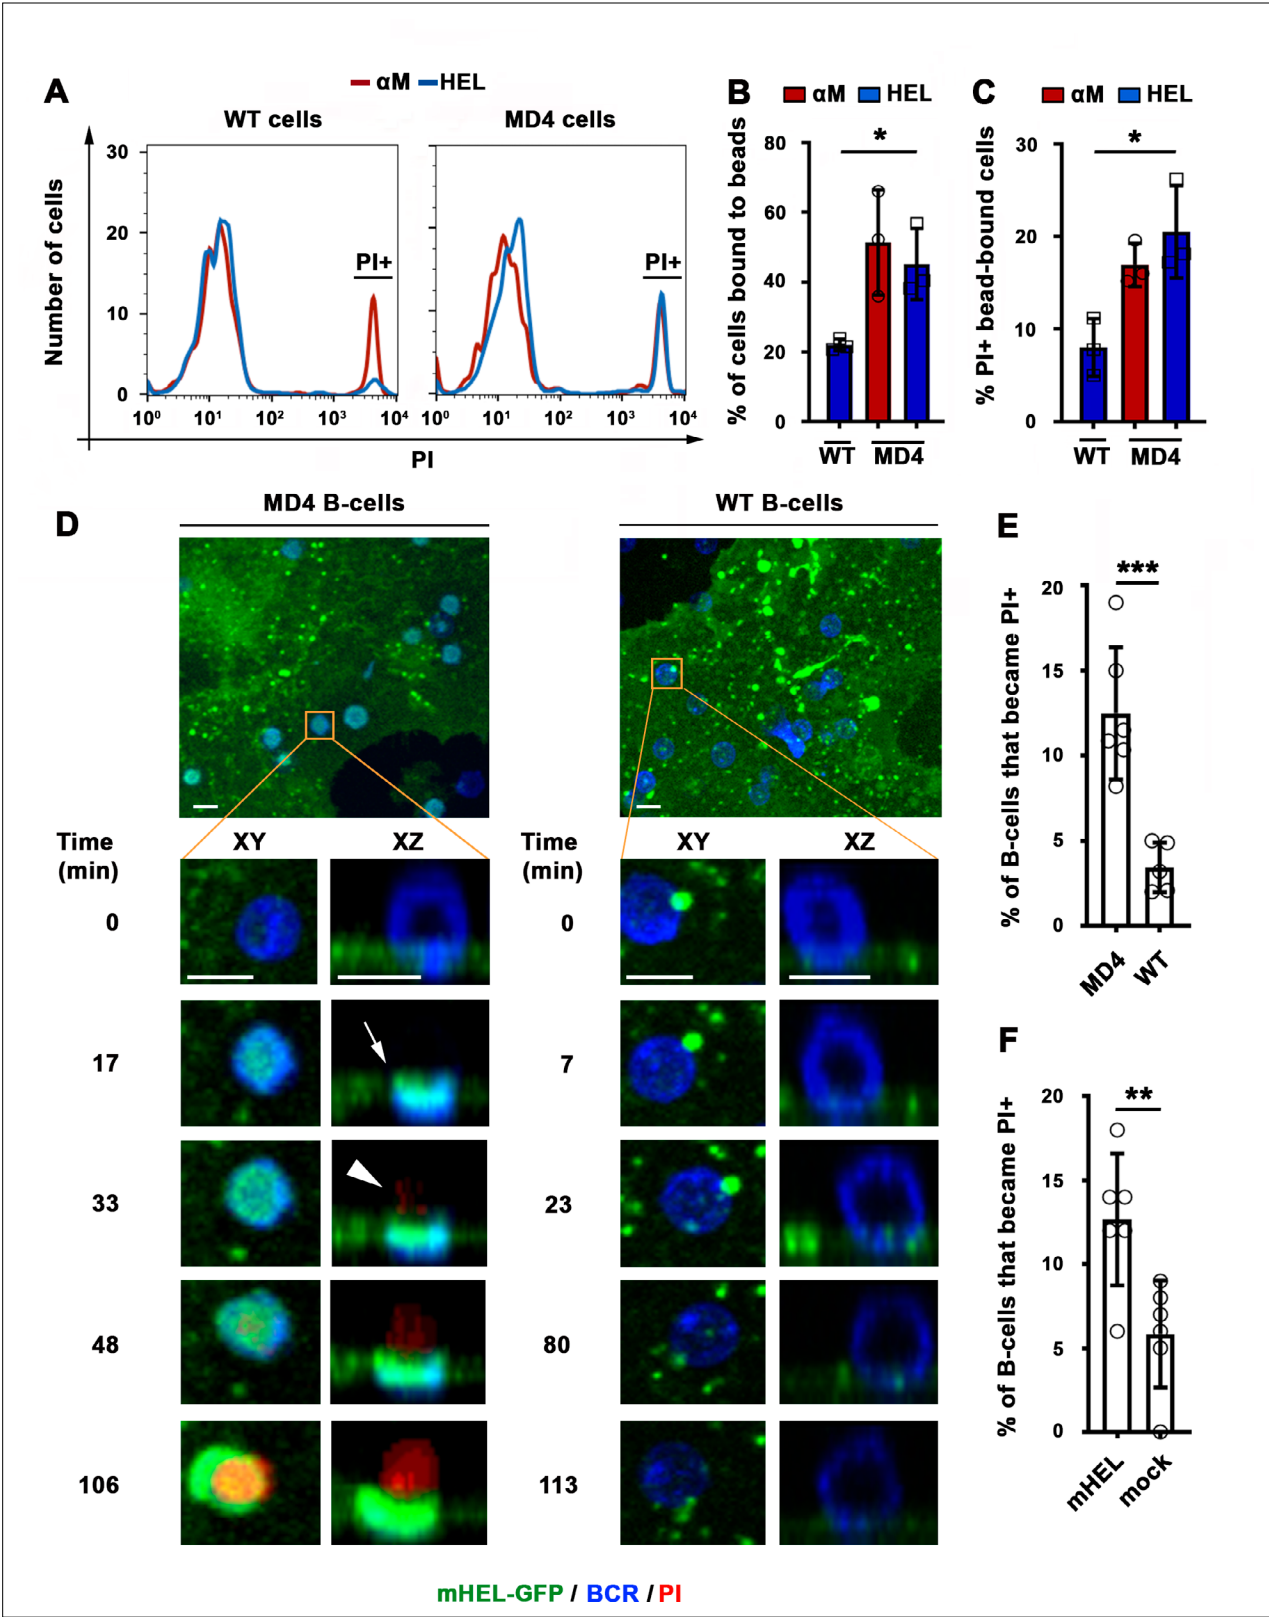

**Figure 3.** BCR-mediated binding of HEL coupled to beads or expressed as a transmembrane protein on COS-7 cells causes B-cell PM permeabilization. (A) Flow cytometry histograms of PI FI in WT or MD4 B-cells incubated with  $\alpha$ M- or HEL-beads for 30 min by flow cytometry, showing 1000 cells per condition. (B) Percentages of WT and MD4 B-cells binding  $\alpha$ M- or HEL-beads. Data points represent independent experiments (mean  $\pm$  SD). (C) Percentages of PI+ bead-bound WT or MD4 B-cells after 30 min incubation. Data points represent independent experiments (mean  $\pm$  SD). (D) Spinning  
Figure 3 continued on next page

*Figure 3 continued*

disk time-lapse images of a MD4 B-cell (left panels) and a WT B-cell (right panels) interacting with a mHEL-GFP-expressing COS-7 cell in the presence of PI (**Videos 6 and 7**). Arrows, clustering of mHEL-GFP during B-cell binding; arrowheads, PI entry in the B-cell. **(E)** Percentages of PI+ MD4 and WT B-cells interacting with COS-7 cells transfected with mHEL-GFP. **(F)** Percentages of PI+ MD4 B-cells interacting with COS-7 cells transfected with mHEL-GFP or mock-transfected. Data points **(E and F)** represent individual videos from three to four independent experiments (mean  $\pm$  SD). Bars, 5  $\mu$ m \* $p \leq 0.05$ , \*\* $p \leq 0.01$ , \*\*\* $p \leq 0.005$ , unpaired Student's t-test **(E, F)** or one-way ANOVA **(B, C)**.

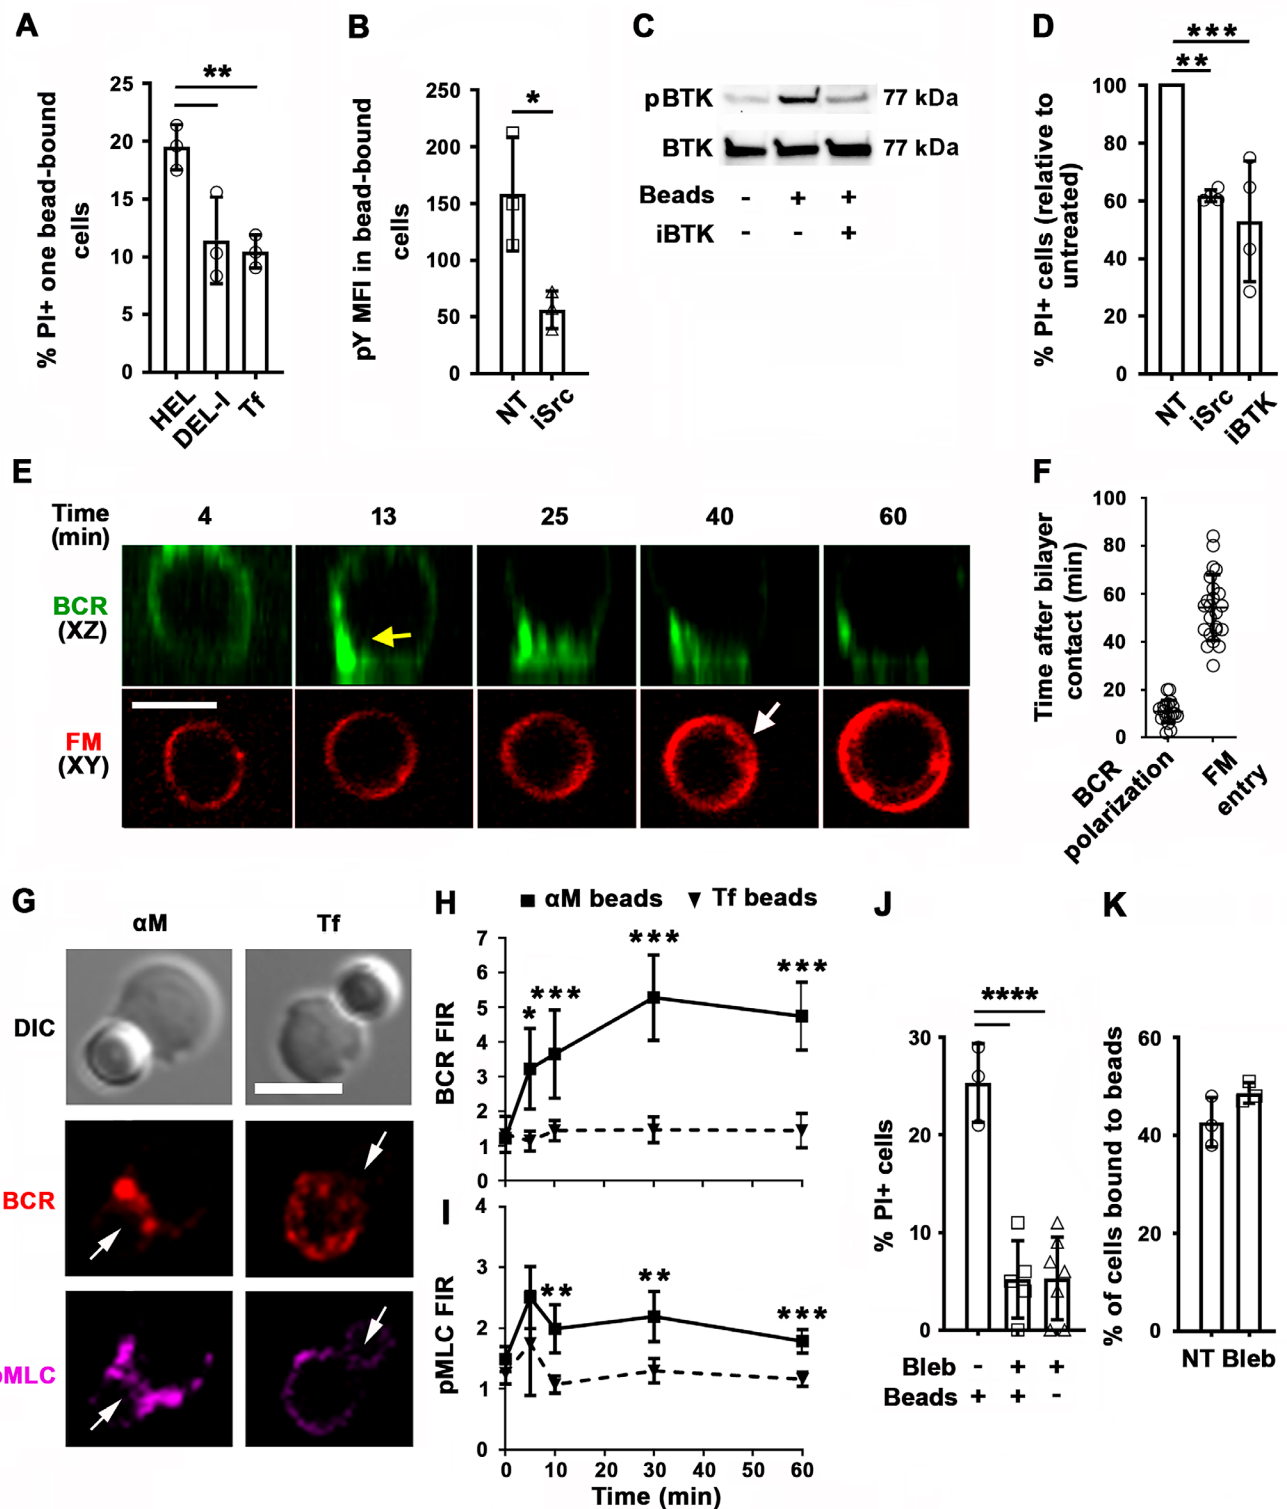

**Figure 4.** PM permeabilization induced by surface-associated antigen depends on high-affinity BCR-antigen binding, BCR signaling, and non-muscle myosin II (NMII) motor activity. **(A)** Percentages of PI+ single bead-binding B-cells after incubation with HEL-, DEL-I- or Tf-beads (1:4 cell:bead ratio) for 30 min. Data points represent independent experiments (mean  $\pm$  SD). **(B)** Mean fluorescence intensity (MFI) of phosphotyrosine (pY) in HEL-bead-bound B-cells treated or untreated (NT) with a Src kinase inhibitor (iSrc) by flow cytometry. Data points represent independent experiments (mean  $\pm$  SD).

Figure 4 continued on next page

## Figure 4 continued

SD). **(C)** Western blot analysis of phosphorylated BTK (pBTK) and BTK in B-cells incubated with HEL-beads in the presence or absence of a BTK inhibitor (iBTK) for 30 min. **(D)** Percentages of PI+ HEL-bead-bound cells treated with iSrc or iBTK relative to not-treated (NT) at 30 min. Data points represent independent experiments (mean  $\pm$  SD). **(E)** Spinning disk time-lapse images of BCR polarization (yellow arrow) in a B-cell incubated with  $\alpha$ M-PLB in the presence of FM4-64 (white arrow, intracellular FM). **(F)** Timing of BCR polarization and FM entry of individual cells interacting with  $\alpha$ M-PLB (**Video 8**). Data points represent individual cells in three independent experiments (mean  $\pm$  SD). **(G)** Confocal images of BCR and phosphorylated NMII light chain (pMLC) staining in B-cells interacting with  $\alpha$ M- or Tf-beads (arrows, bead binding sites). **(H and I)** FI ratio (FIR) of BCR (**H**) and pMLC (**I**) staining at the bead-binding site relative to the opposite PM in  $\alpha$ M- and Tf-bead-bound cells over time. Data represent the averages of three independent experiments (mean  $\pm$  SD). **(J)** Percentages of PI+ bead-binding B-cells incubated with  $\alpha$ M-beads for 30 min with or without blebbistatin (Bleb). Data points represent individual videos from three independent experiments (mean  $\pm$  SD). **(K)** Percentages of bead-bound B-cells incubated with  $\alpha$ M-beads for 30 min in the presence or absence of Bleb. Data points represent independent experiments (mean  $\pm$  SD). Bars, 5  $\mu$ m. \* $p \leq 0.05$ , \*\* $p \leq 0.01$ , \*\*\* $p \leq 0.005$ , \*\*\*\* $p \leq 0.001$ , unpaired Student's t-test (**B, H, I, K**) or one-way ANOVA (**A, D, J**).

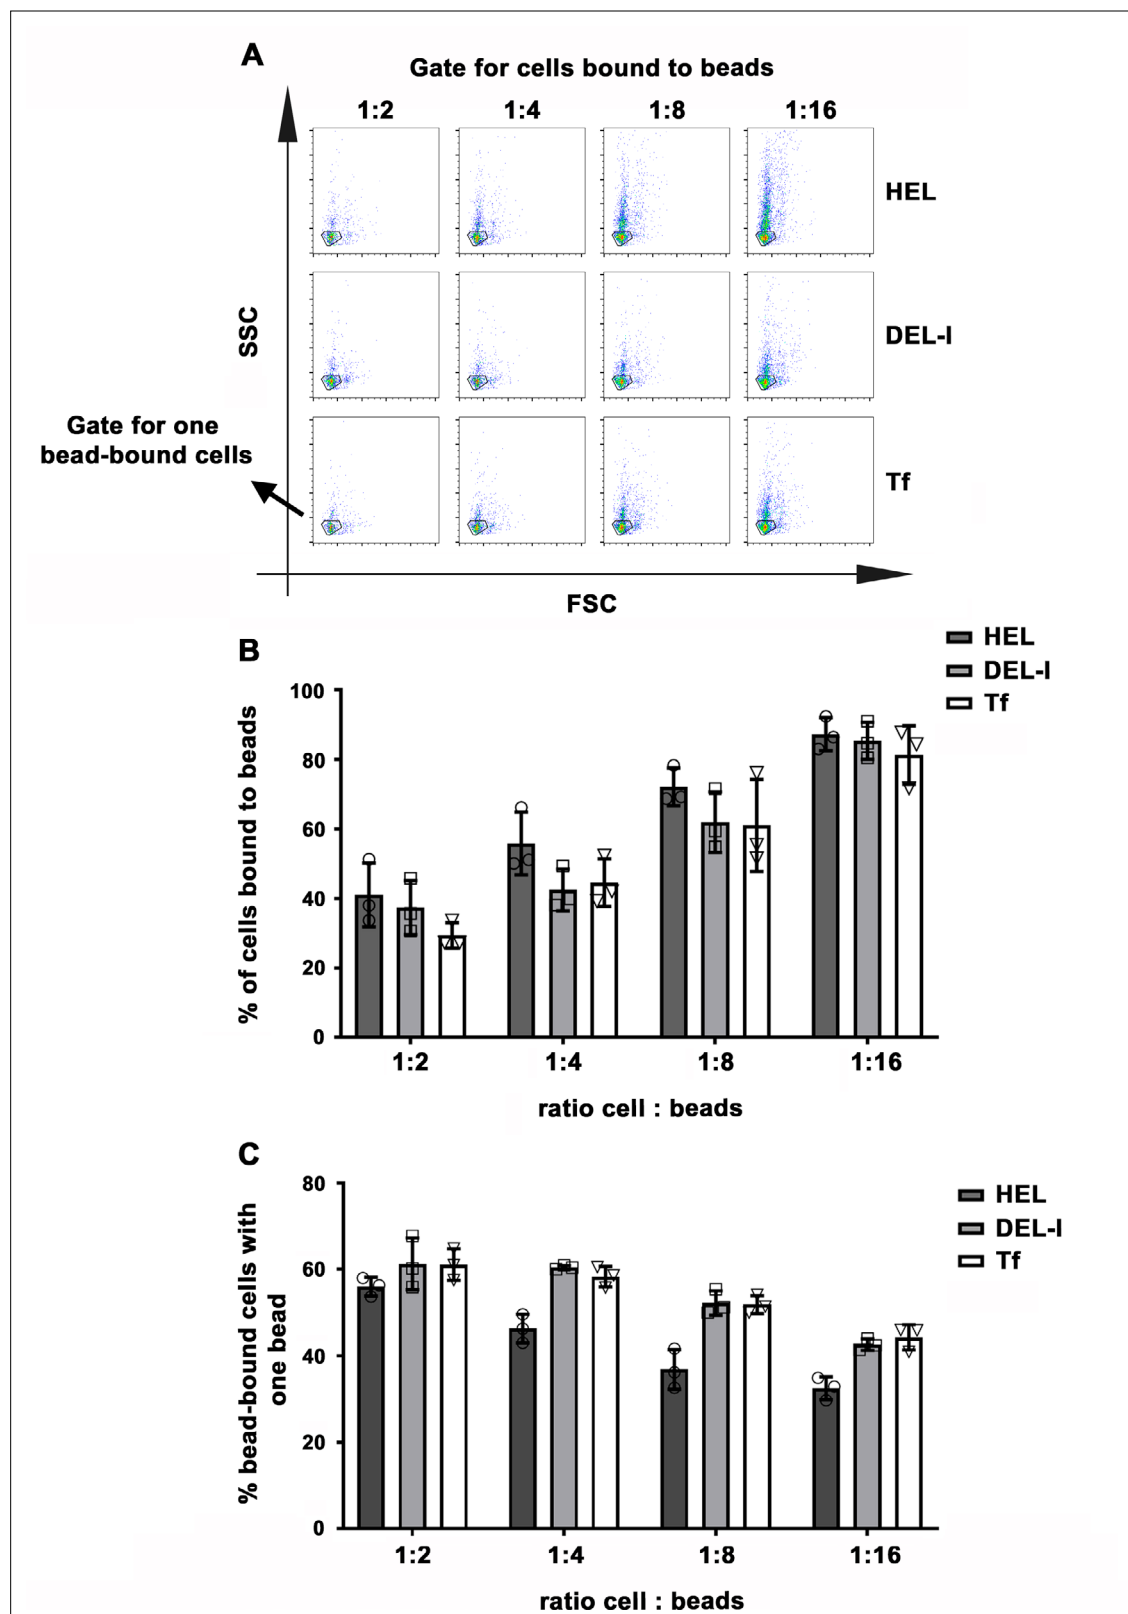

**Figure 4—figure supplement 1.** Impact of BCR-antigen affinity on B-cell-bead binding. Splenic B-cells were incubated with HEL, DEL-I or Tf-beads at the indicated cell:bead ratios for 30 min at 37 °C and analyzed by flow cytometry. **(A)** Representative SSC versus FSC dot plots gated for bead-bound populations. Outlined areas indicate populations of cells binding one single bead. **(B)** Percentages of total B-cells that bound to beads. Data points represent independent experiments (mean  $\pm$  SD). **(C)** Percentages of bead-bound B-cells binding one single bead. Data points represent independent experiments (mean  $\pm$  SD). No statistically significant differences were detected (one-way ANOVA).



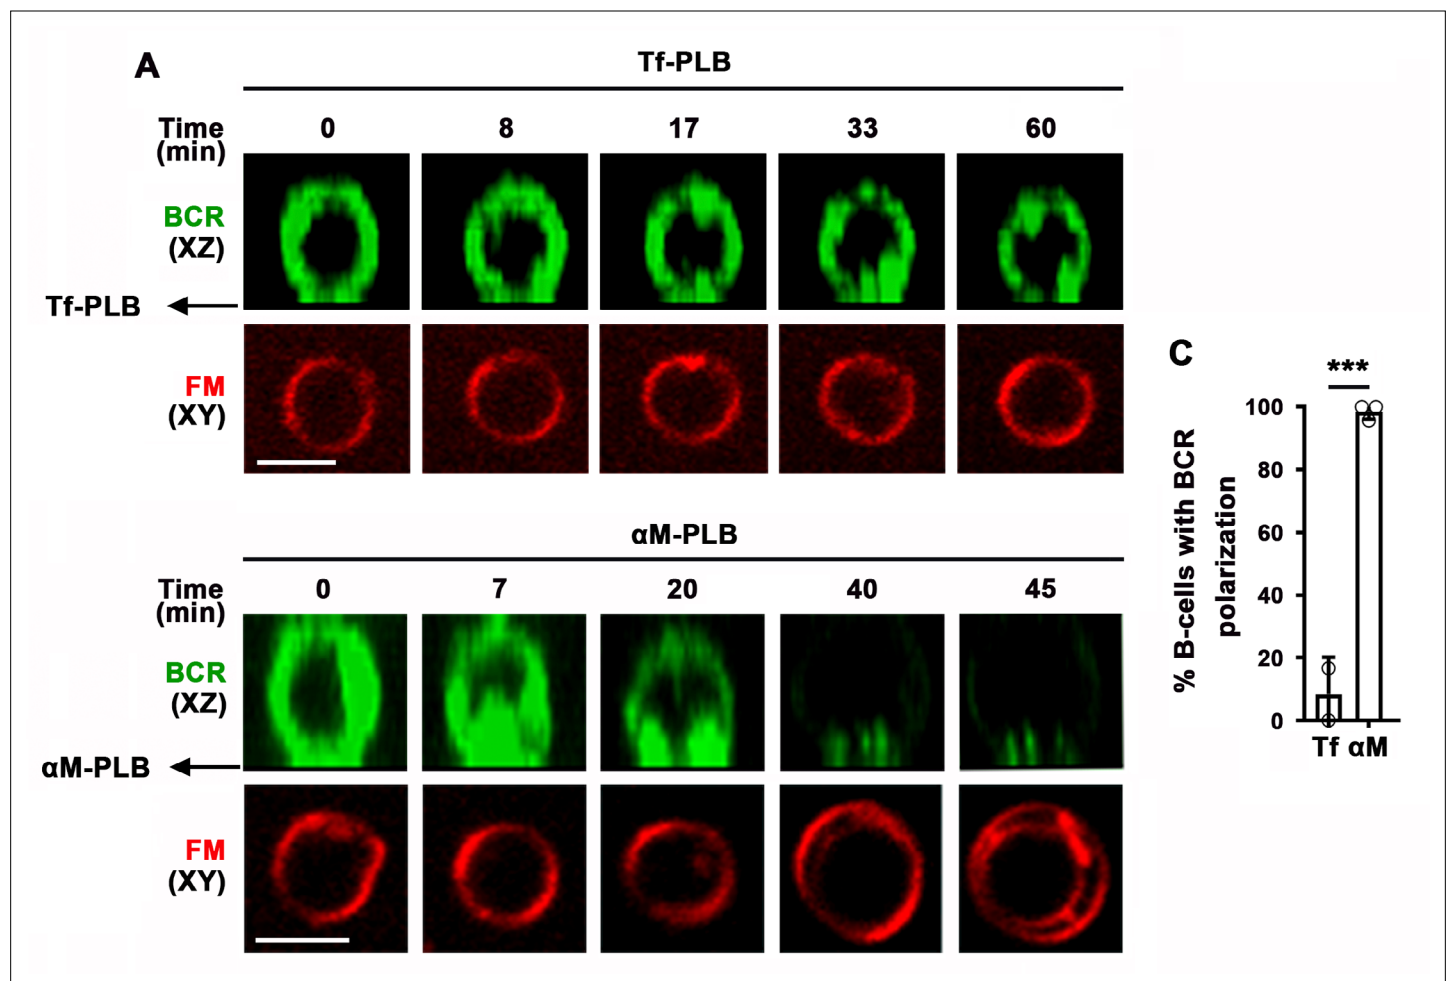

**Figure 4—figure supplement 2.** B-cell binding to αM-PLB but not to Tf-PLB triggers BCR polarization first and PM permeabilization later. **(A)** Splenic B-cells stained for surface BCR (green) were incubated with Tf-PLB (top panels) or αM-PLB (bottom panels) for 60 min at 37 °C in the presence of FM4-64 (red) and imaged by live spinning disk fluorescence microscopy. **(B)** Percentages of B-cells with BCR polarization after incubation with Tf- or αM-PLB. Data points represent independent experiments (mean ± SD). \*\*\* $p \leq 0.005$ , unpaired Student's *t*-test.

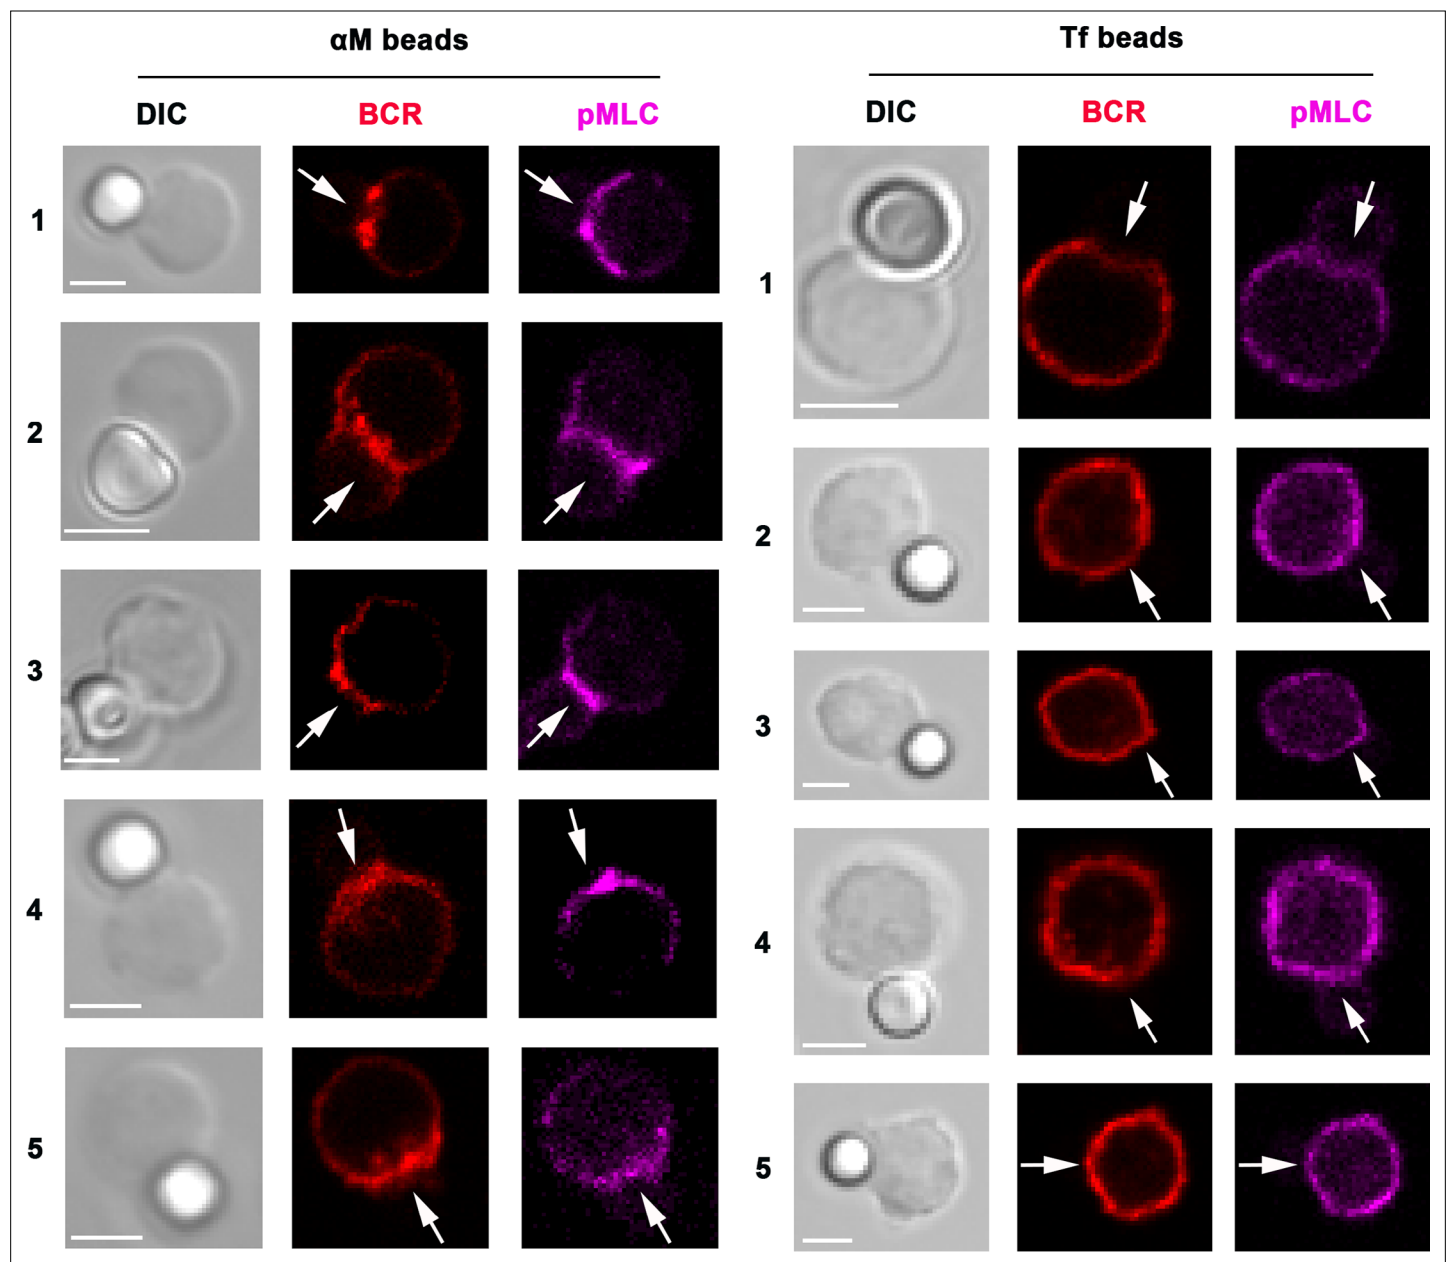

**Figure 4—figure supplement 3.** BCR and phosphorylated myosin light chain (pMLC) polarize toward  $\alpha$ M-bead binding sites. The images show several examples of splenic B-cells stained for surface BCRs with a Cy3-labeled Fab fragment of donkey anti-mouse IgM+ G (red), incubated with  $\alpha$ M (left, 5 examples)- or Tf (right, 5 examples)-beads, fixed, permeabilized, and stained for pMLC (magenta) and analyzed by confocal fluorescence microscopy. The arrows point to bead contact sites in B-cells. Bars, 3  $\mu$ m.

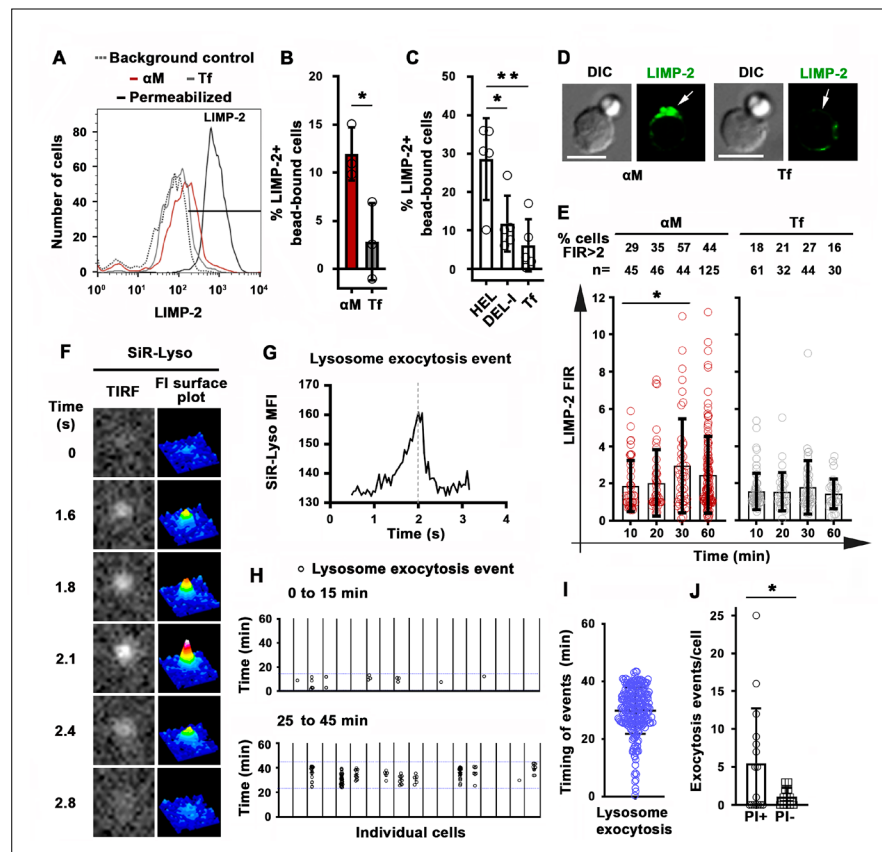

**Figure 5.** Antigen-induced permeabilization triggers lysosomal exocytosis. **(A)** Flow cytometry analysis of surface-exposed (no detergent permeabilization) and/or intracellular LIMP-2 (with detergent permeabilization) of bead-bound B-cells after incubation with  $\alpha$ M- or Tf-beads for 30 min, showing 3000 cells per condition. **(B and C)** Percentages of cells with surface-exposed LIMP-2 (relative to values with secondary antibody alone) in bead-bound B-cells incubated with  $\alpha$ M- or Tf-beads **(B)** or with HEL-, DEL-I- or Tf-beads **(C)** for 30 min. Data points represent independent experiments (mean  $\pm$  SD). **(D)** Confocal images of surface-exposed LIMP-2 in B-cells incubated with  $\alpha$ M- or Tf-beads (arrows, bead-binding sites). **(E)** FIR (bead-binding site:opposite PM) of surface-exposed LIMP-2 in individual cells over time. Data points represent individual cells (mean  $\pm$  SD). **(F)** Total internal reflection microscopy (TIRF) images (left) and FI surface plots (right) of SiR-Lyso at the B-cell surface contacting  $\alpha$ M-PLB (**Video 10**). **(G)** Representative MFI versus time plot of a SiR-Lyso-loaded lysosome undergoing exocytosis. **(H)** SiR-Lyso exocytosis events (circles) in individual B-cells during the first 0–15 min or 25–45 min of incubation with  $\alpha$ M-PLB. **(I)** Timing of individual SiR-Lyso exocytosis events in B-cells incubated with  $\alpha$ M-PLB for 45 min. Data points represent individual SiR-Lyso exocytosis events from three independent experiments (mean  $\pm$  SD). **(J)** Numbers of SiR-Lyso exocytosis events per B-cell permeabilized (PI+) or not permeabilized (PI-) by  $\alpha$ M-PLB during 45 min. Data points represent individual cells from three independent experiments (mean  $\pm$  SD). \* $p \leq 0.05$ , \*\* $p \leq 0.01$ , unpaired Student's t-test **(B and J)** or one-way ANOVA **(C and E)**. Bars, 5  $\mu$ m.

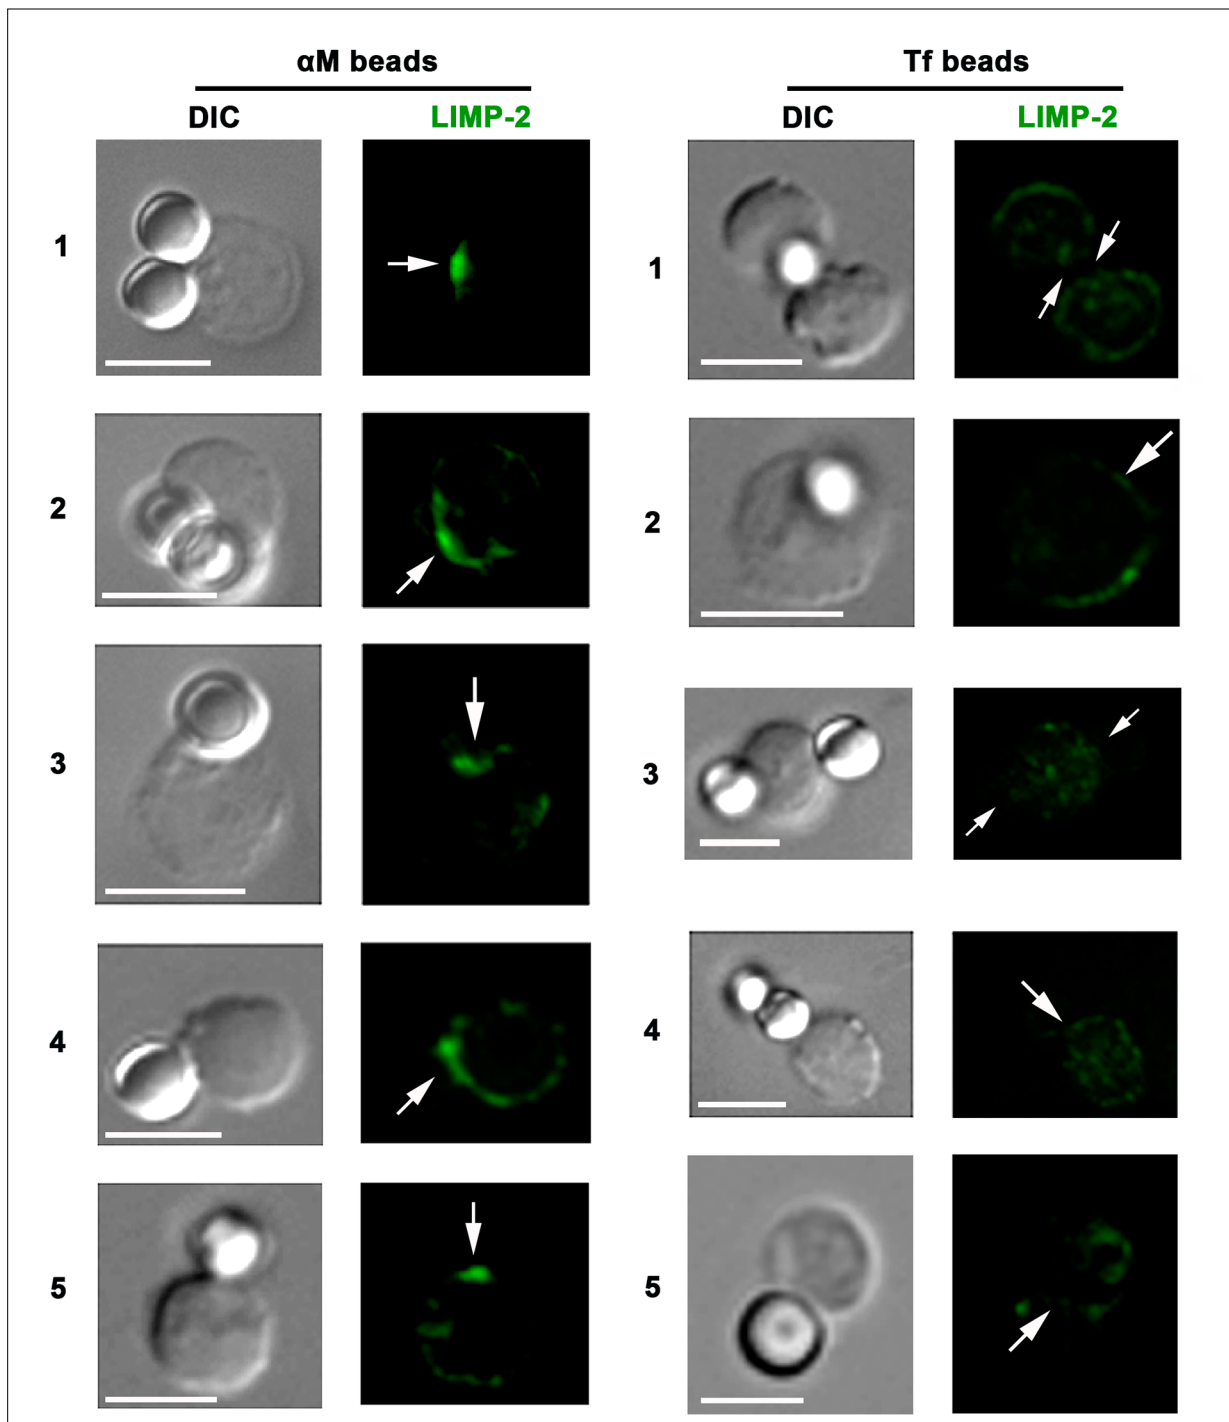

**Figure 5—figure supplement 1.** BCR-mediated binding of  $\alpha$ M-beads induces surface exposure of the LIMP-2 luminal domain at bead contact sites. The images show several examples of splenic B-cells incubated with  $\alpha$ M (left)- or Tf (right)-beads for 30 min at 37 °C, stained with LIMP-2-specific antibodies (green) at 4 °C without detergent permeabilization, followed by fixation, staining with secondary antibodies, and analysis by confocal fluorescence microscopy. Arrows, sites of bead binding on B-cells. Bar, 5  $\mu$ m.

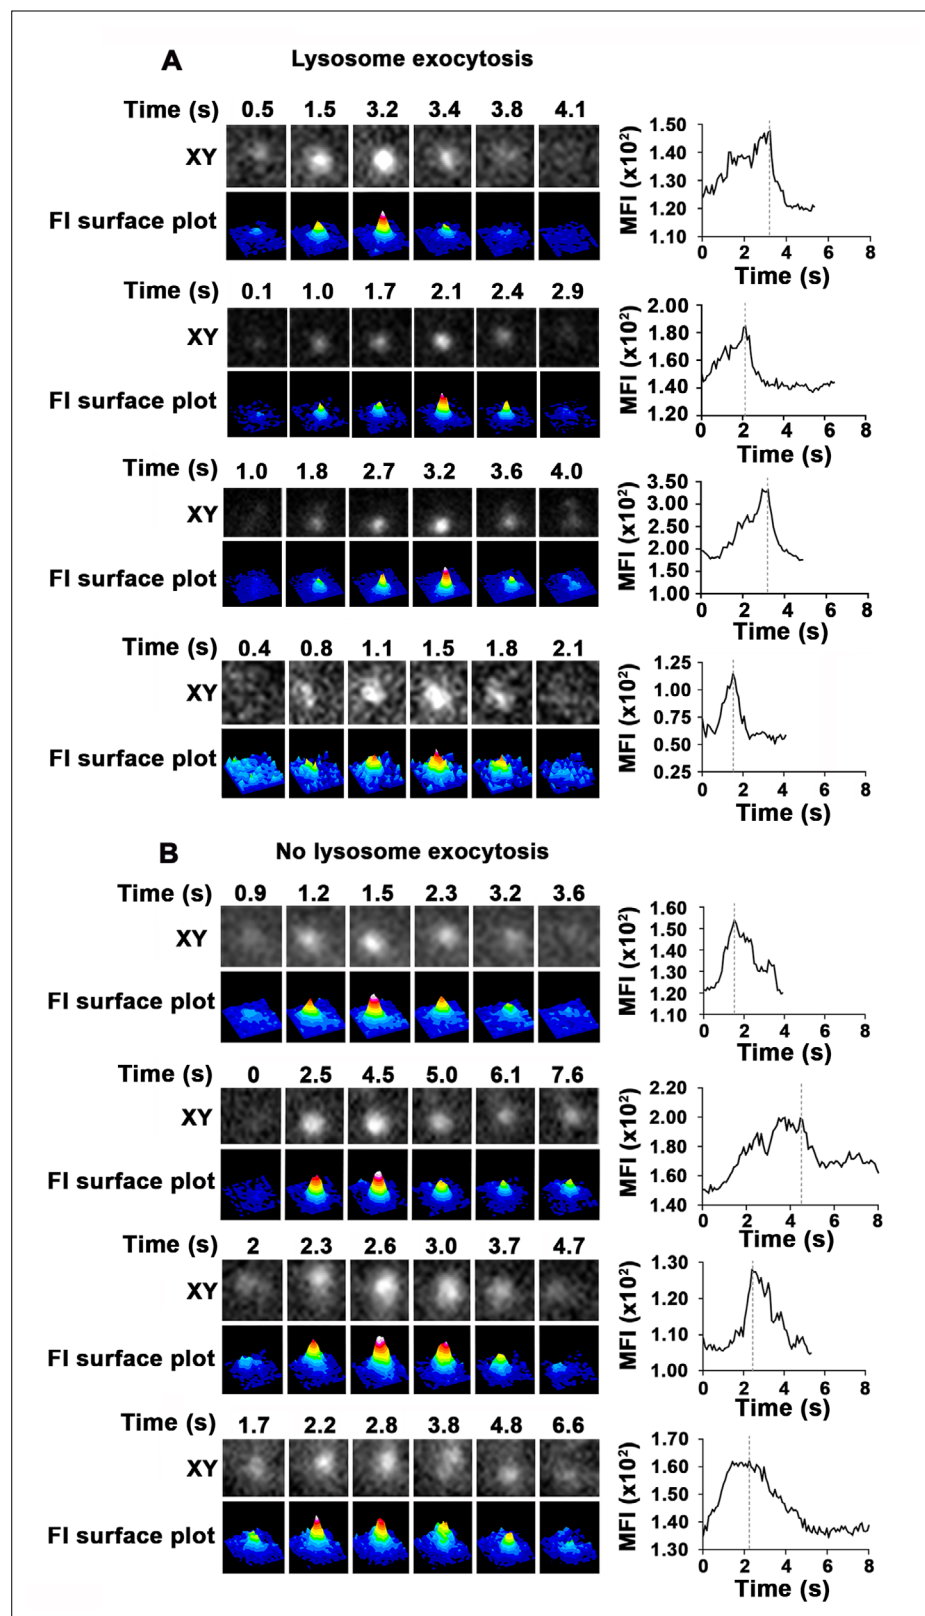

**Figure 5—figure supplement 2.** Detection of lysosomal exocytosis by TIRF microscopy. Splenic B-cells were added to  $\alpha$ M-PLB and imaged by TIRF at eight frames/s. Live time-lapse XY images of individual SiR-Lyso puncta (top rows), their FI surface plots (bottom rows), and MFI (plots on right) within the TIRF evanescent field over time are shown for four examples where lysosomal exocytosis occurred (A, rapid decrease in MFI, consistent with rapid dye loss upon PM fusion) or not (B, slow reduction in MFI, likely due to lysosome movement away from the PM).

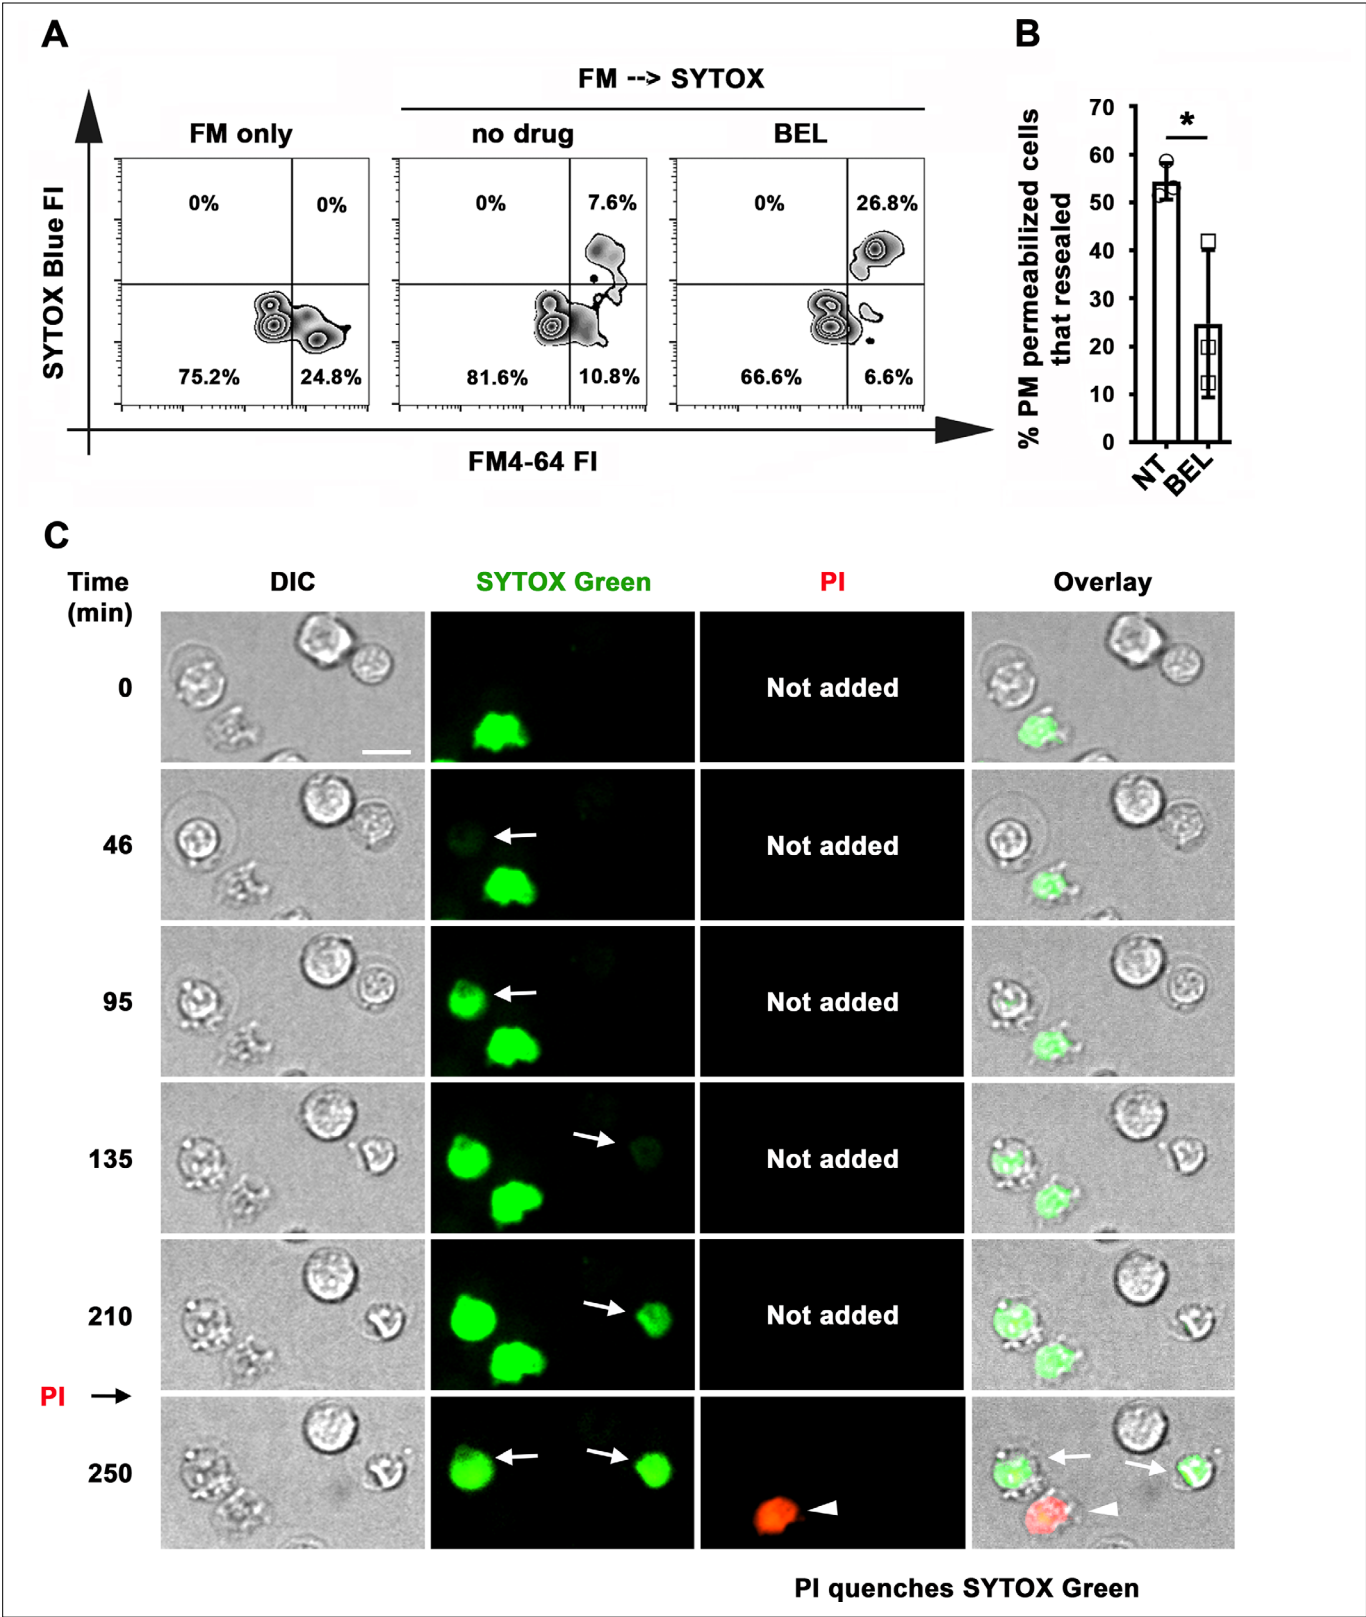

**Figure 6.** Antigen-permeabilized B-cells resealed their PM in a lysosomal exocytosis-dependent manner. **(A)** B-cells were incubated with  $\alpha$ M-beads and permeabilized/resealed cells were assessed by flow cytometry of FM4-64 (added from the start) and SYTOX Blue (added in the last 10 min) FI, in the presence or absence of BEL. **(B)** Percentages of permeabilized  $\alpha$ M-bead-bound cells that resealed in the presence or absence of BEL. Data points represent independent experiments (mean  $\pm$  SD). **(C)** Time-lapse images of splenic B-cells incubated with  $\alpha$ M-PLB in the presence of SYTOX Green. PI quenches SYTOX Green

Figure 6 continued on next page

Figure 6 continued

was added for 10 min at the end (**Video 11**). Arrows, cells that became permeabilized after contacting the  $\alpha$ M-PLB and later excluded PI; arrowhead, cell that was SYTOX + since the start of the video and did not exclude PI. \* $p \leq 0.05$ , unpaired Student's t-test (**B**). Bar, 5  $\mu$ m.



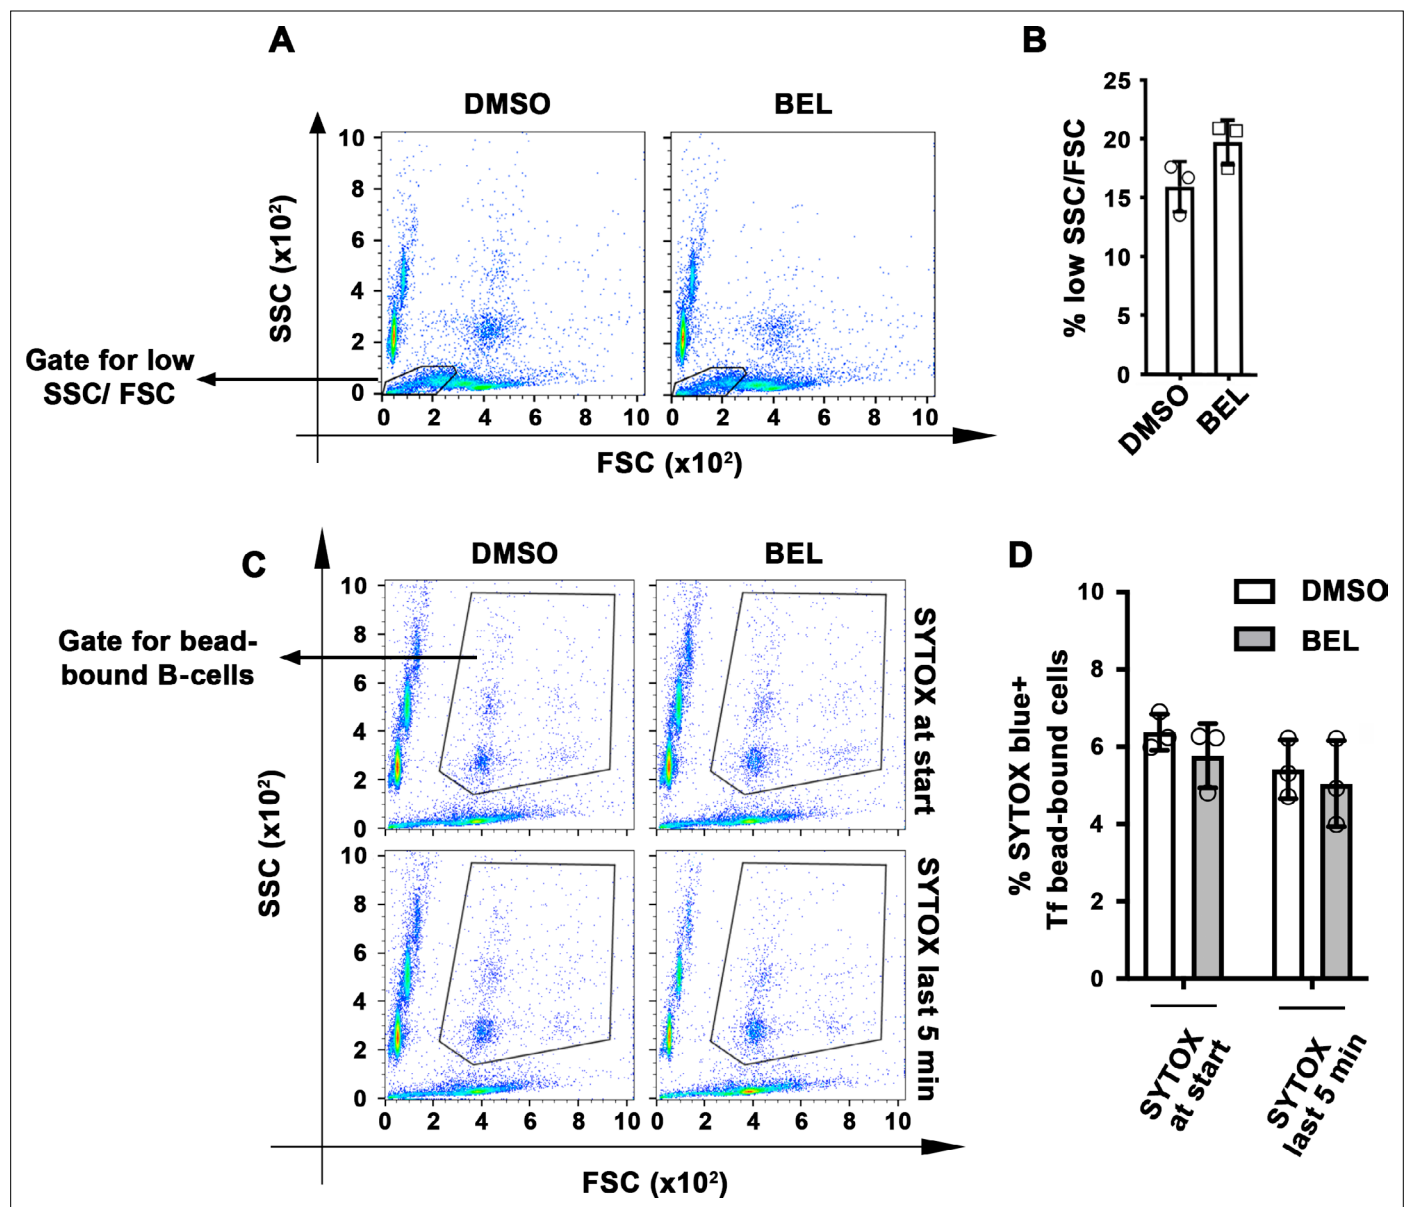

**Figure 6—figure supplement 1.** BEL does not affect the PM integrity and viability of B-cells. Splenic B-cells were pretreated or not with BEL and incubated with  $\alpha$ M-beads in the presence of FM4-64 and analyzed by flow cytometry. **(A)** Representative dot plots of side scatter (SSC) versus forward scatter (FSC) of B-cells incubated with  $\alpha$ M-beads. Outlined areas indicate the low SSC/FSC populations that correspond to dead cells. **(B)** Percentage of low SSC/FSC B-cells incubated with  $\alpha$ M-beads treated or not with BEL. Data points represent independent experiments (mean  $\pm$  SD). **(C)** Representative dot plots of side scatter (SSC) versus forward scatter (FSC) of B-cells incubated with Tf-beads in the presence of SYTOX Blue throughout the experiment (30 min) or only in the last 5 min. Outlined areas indicate B-cell populations binding Tf beads. **(D)** Percentages of SYTOX Blue-positive (+). Tf-bead-bound cells. Data points represent independent experiments (mean  $\pm$  SD). No statistically significant differences were detected (Student's *t*-test).

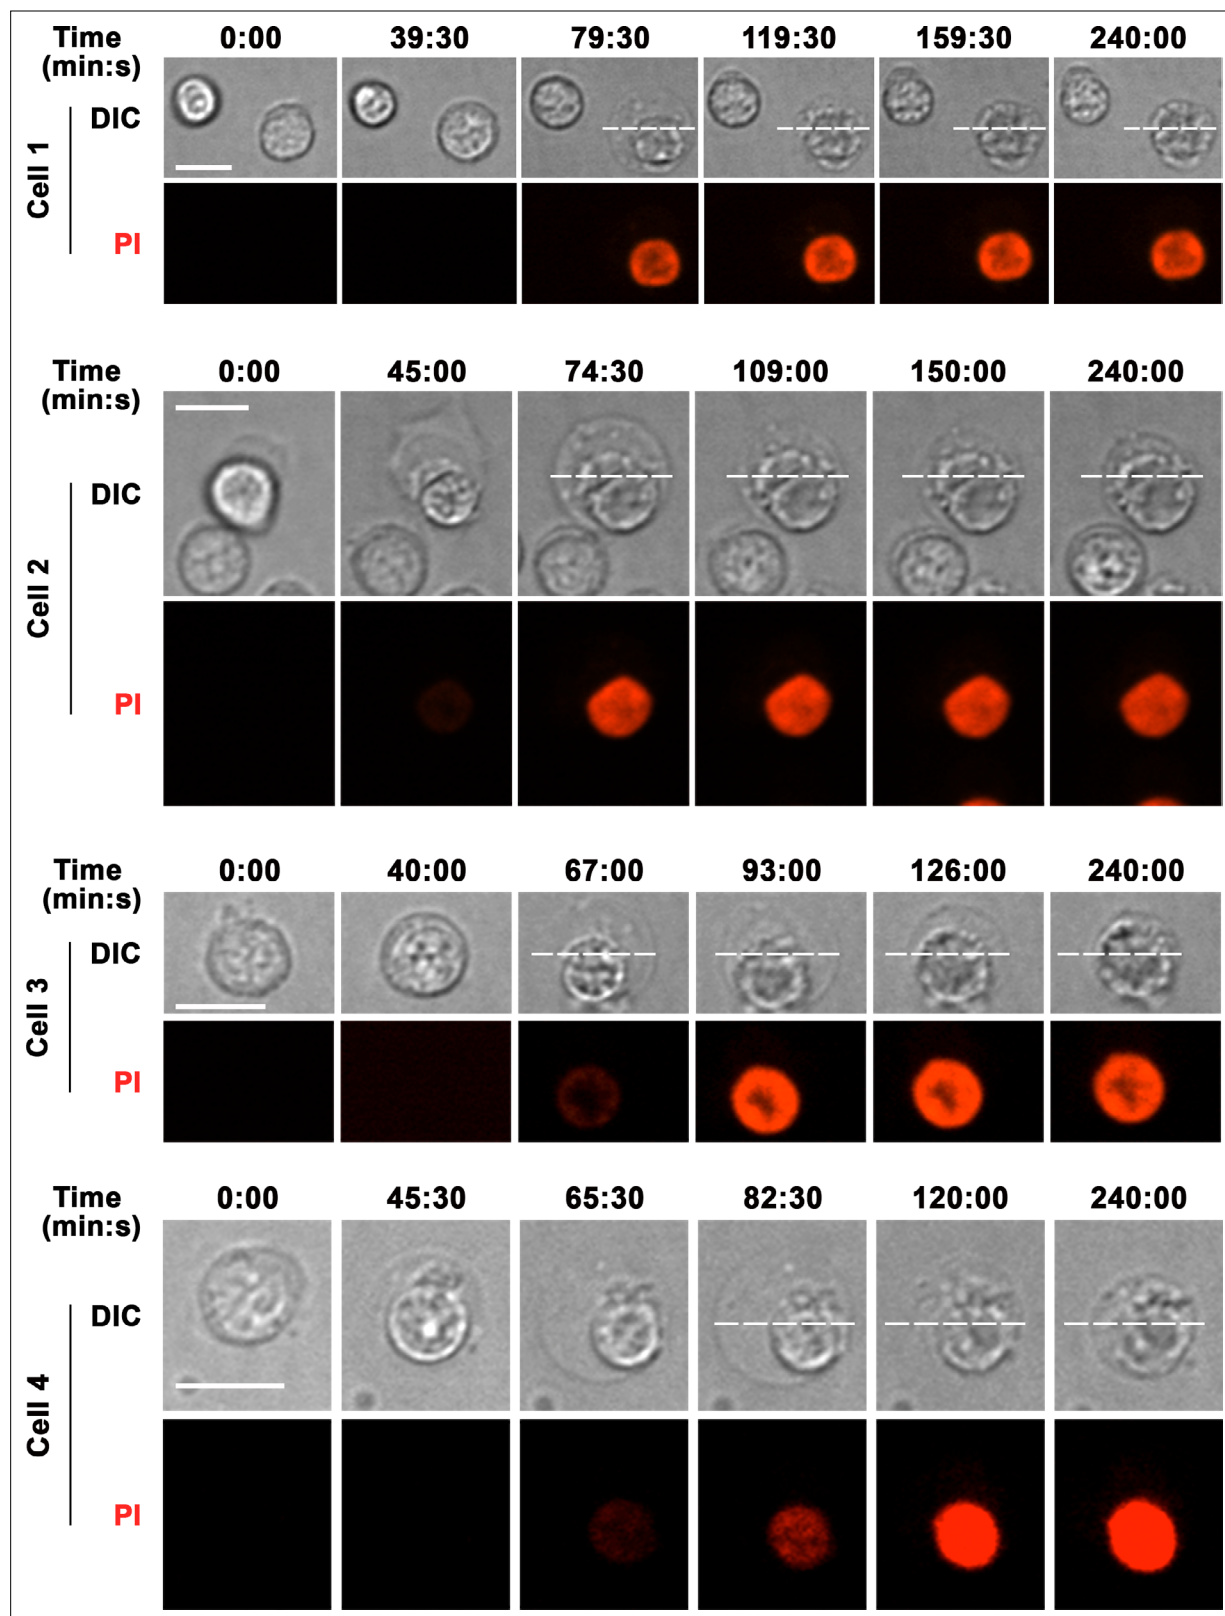

**Figure 6—figure supplement 2.** B-cell morphological changes occurring during permeabilization by surface-associated antigen are reversible. Spinning disk time-lapse images of B-cells interacting with  $\alpha$ M-PLB in the presence of PI (red). The dashed line indicates the maximum cell diameter initially reached by a B-cell that became permeabilized, allowing PI influx (**Video 12**). The later frames indicate that the cell gradually recovers its original morphology. Bars, 5  $\mu$ m.

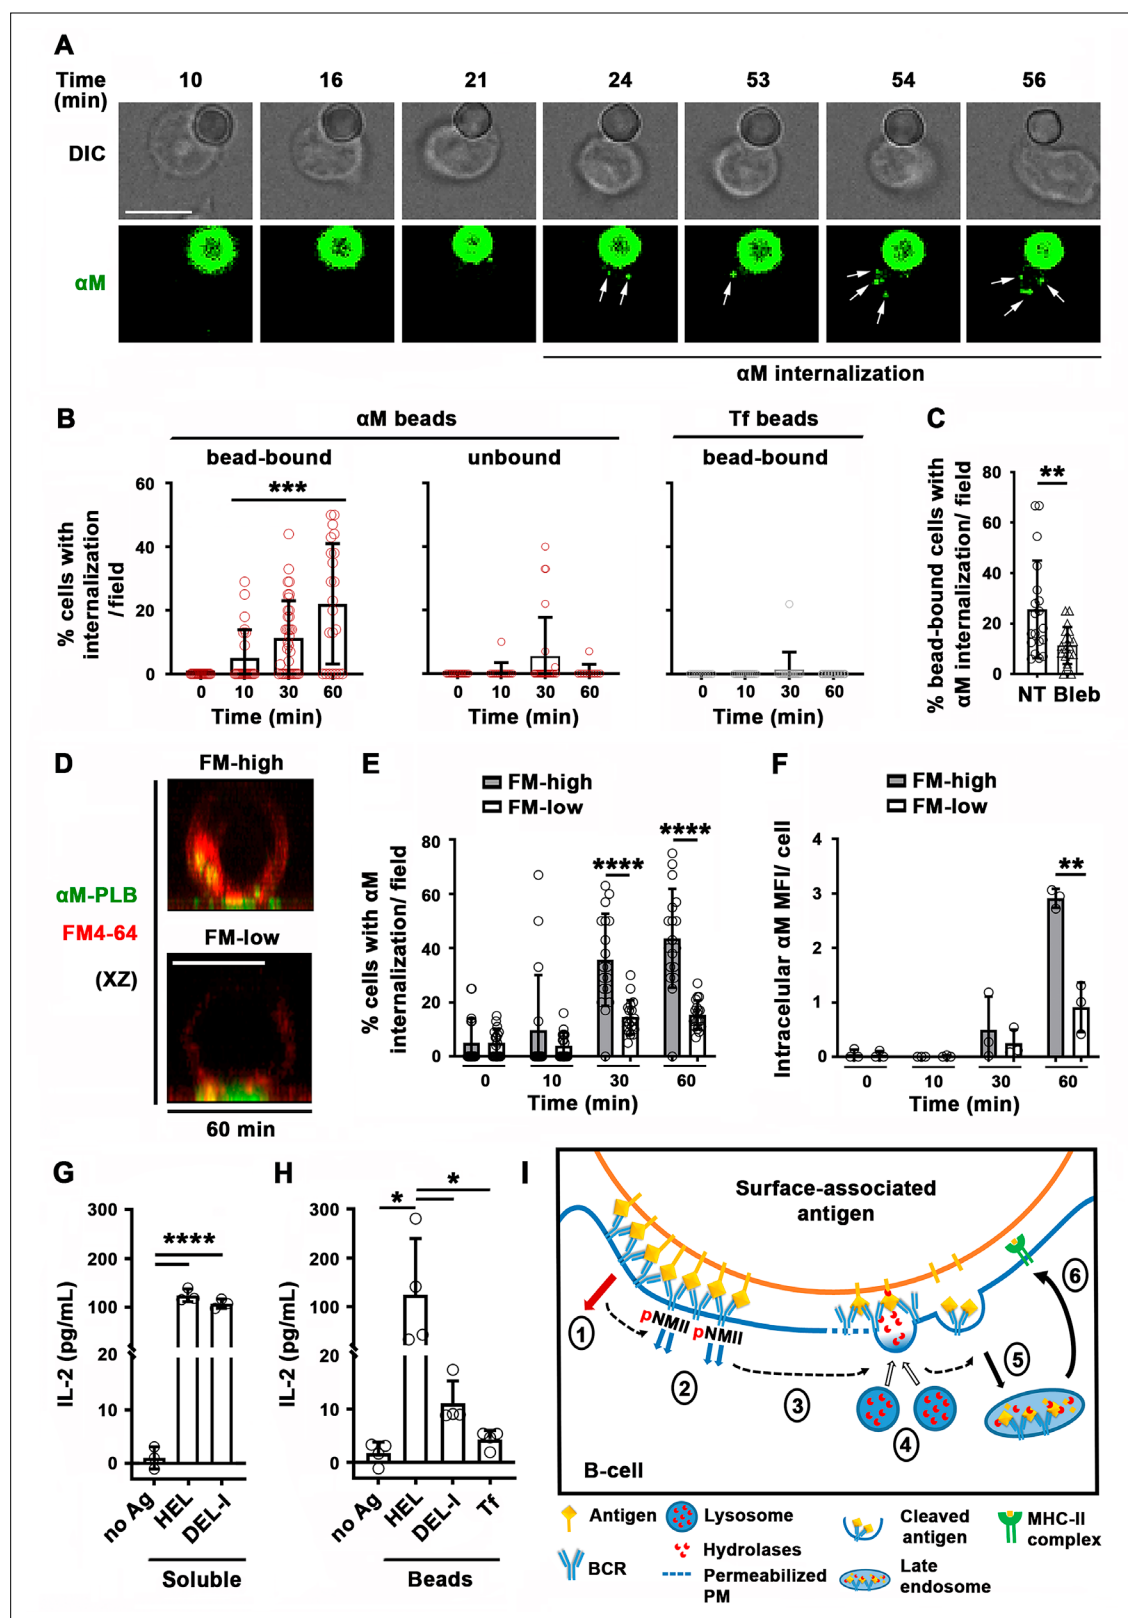

**Figure 7.** Antigen-induced PM permeabilization promotes antigen internalization and presentation. (A) Confocal live imaging of a B-cell interacting with fluorescent  $\alpha$ M-beads (arrows, internalized  $\alpha$ M). (B) Percentages of cells containing internalized  $\alpha$ M or Tf, bound or not to  $\alpha$ M- or Tf-beads, over time. Data points represent individual fields in three independent experiments (mean  $\pm$  SD). (C) Percentages of bead-bound B-cells with internalized  $\alpha$ M in the presence or absence of Bleb after 60 min. Data points represent individual fields in four independent experiments (mean  $\pm$  SD). (D) Confocal

Figure 7 continued on next page

## Figure 7 continued

images (xz) of  $\alpha$ M internalization in B-cells permeabilized (FM-high) or not permeabilized (FM-low) by  $\alpha$ M-PLB after 60 min. **(E)** Percentages of B-cells, permeabilized (FM-high) or not permeabilized (FM-low) by  $\alpha$ M-PLB, containing internalized  $\alpha$ M over time. Data points represent individual fields in three independent experiments (mean  $\pm$  SD). **(F)** MFI values of internalized  $\alpha$ M in individual B-cells permeabilized (FM-high) or not (FM-low) by  $\alpha$ M-PLB over time. Data points represent independent experiments (mean  $\pm$  SD). **(G)** IL-2 secretion by 3A9 T-cells activated by B-cells incubated with or without (no Ag) soluble HEL or DEL-I (10  $\mu$ g/ml) for 72 hr. Data points represent independent experiments (mean  $\pm$  SD). **(H)** IL-2 secretion by 3A9 T-cells activated by B-cells incubated with or without HEL-, DEL-I- or Tf-beads (1:4 cell:bead ratio) for 72 hr. Bars, 5  $\mu$ m. Data points represent independent experiments (mean  $\pm$  SD). \* $p \leq 0.05$ , \*\* $p \leq 0.01$ , \*\*\* $p \leq 0.005$ , \*\*\*\* $p \leq 0.0001$ , unpaired Student's *t*-test (**C**, **E**, **F**), one-way ANOVA (**G and H**) or Kruskal-Wallis non-parametric test (**B**). **(I)** Cartoon depicting a working model for the spatiotemporal relationship of events initiated by the interaction of the BCR with surface-associated antigen. High-affinity binding stabilizes BCR-antigen interaction and induces strong BCR signaling (1) and NMII activation (2). Activated NMII generates local traction forces that permeabilize the PM (3), triggering a localized PM repair response mediated by lysosomal exocytosis. Lysosome exocytosis releases hydrolases that cleave antigen off surfaces (4), facilitating endocytosis (5) and presentation to T-cells (6).
